# Supplementary material for: Safety and efficacy of direct acting oral anticoagulants and vitamin K antagonists in nonvalvular atrial fibrillation – a network meta-analysis of real-world data
Source: Atypon-hosted journal article supplement (doi:10.1024/0301-1526/a000746), 2018-10-30
Supplement: 0301-1526_a000746_esm01.pdf [file 0301-1526_a000746_esm01.pdf]

ESM 1. Supplementary Table 1a. Study characteristics: Design, methodology, region and data source, enrollment period, and duration of follow up (d...days, m...months, y...years).

| Study                         | Ref  | Design | Methodology | Evaluated endpoints                             | Drugs | Region/data source                                             | Enrollment period     | Duration of follow up |
|-------------------------------|------|--------|-------------|-------------------------------------------------|-------|----------------------------------------------------------------|-----------------------|-----------------------|
| <b>Amin 2013</b>              | (22) | RR     | Crude rates | Stroke, Major bleeding                          | V     | US / Medco database                                            | Jan 2007-Jun 2010     | 1.8 y                 |
| <b>Larsen 2013</b>            | (23) | RC     | PSM         | Stroke, Major bleeding, IC bleeding, Deaths, MI | DV    | DK / Nationwide database                                       | Jun 2012-Dec 2013     | 1.2 y                 |
| <b>Sörensen 2013</b>          | (24) | RC     | CA          | Major bleeding                                  | DV    | DK / Nationwide database                                       | Aug 2011-Dec 2011     | 6 m                   |
| <b>Southworth 2013</b>        | (25) | RC     | Crude rates | IC bleeding, GI bleeding                        | DV    | US / Mini-sentinel distributed database                        | Oct 2010-Dec 2011     | 100 d                 |
| <b>Bengtson Abstract 2014</b> | (26) | RC     | PSM         | Stroke, IC bleeding, GI bleeding                | DRV   | US / MarketScan Commercial and Medicare Supplemental databases | 2010-2012             | 1.6 y                 |
| <b>Beyer-Westendorf 2014</b>  | (27) | PR     | Crude rates | Major bleeding, NMCR                            | R     | Germany / Dresden registry of daily care patients              | Oct 2011-Dec 2013     | 12 m                  |
| <b>Fontaine 2014</b>          | (28) | RC     | Crude rates | Major bleeding                                  | DR    | US / Intermountain healthcare records                          | Oct 2010-Nov 2012     | 2.0 y                 |
| <b>Laliberte 2014</b>         | (29) | RC     | PSM         | Stroke/SE, Major bleeding, IC bleeding          | RV    | US / Symphony health solutions' patient transactional datasets | Nov 2011-Jul 2012     | 98 d                  |
| <b>Larsen 2014</b>            | (30) | RC     | PSM         | Major bleeding, IC bleeding                     | DV    | DK / Nationwide database                                       | Aug 2011-Dec 2012 (D) | 1.7 y                 |

| Study                    | Ref  | Design | Methodology | Evaluated endpoints              | Drugs | Region/data source                            | Enrollment period     | Duration of follow up |
|--------------------------|------|--------|-------------|----------------------------------|-------|-----------------------------------------------|-----------------------|-----------------------|
|                          |      |        |             |                                  |       |                                               | Aug 2009-Dec 2010 (V) |                       |
| <b>Navgren 2014</b>      | (31) | PR     | Crude rates | Major bleeding, IC bleeding      | V     | Sweden / Anticoagulation clinic Helsingborg   | Nov 2007-Nov 2010     | 1.9 y                 |
| <b>Ogawa 2014</b>        | (32) | PR     | Crude rates | Stroke, Major bleeding, MI, NMCR | R     | Japan / Post marketing surveillance registry  | Apr 2012-Dec 2013     | 6 m                   |
| <b>Siu 2014</b>          | (33) | RR     | Crude rates | IC bleeding                      | V     | Hong Kong / Queen Mary hospital database      | Jul 1997-Dec 2011     | 3.2 y                 |
| <b>Tran 2014</b>         | (34) | RR     | Crude rates | GI bleeding                      | D     | US / Single hospital database                 | Jan 2011-Dec 2011     | 10 m                  |
| <b>Yap 2014</b>          | (35) | PR     | Crude rates | Major bleeding                   | D     | Malaysia / National health instute hospital   | Oct 2012-Mar 2013     | 10 m                  |
| <b>Abraham 2015</b>      | (36) | RC     | PSM         | Stroke, GI bleeding              | DRV   | US / Optumlabs data warehouse database        | Nov 2010-Sep 2013     | 1.1 y                 |
| <b>Avgil-Tsadok 2015</b> | (37) | RC     | PSW         | Stroke, Bleeding, Deaths, MI     | DV    | Canada / Quebec hospital discharge database   | Jan 1999-March 2013   | 7 m                   |
| <b>Bouillon 2015</b>     | (38) | RMC    | CA          | Stroke/SE, Major bleeding, MI    | DRV   | France / Nationwide health-insurance database | Jan 2011-Nov 2012     | 10 m                  |

| Study                       | Ref  | Design | Methodology | Evaluated endpoints                                    | Drugs | Region/data source                                          | Enrollment period | Duration of follow up |
|-----------------------------|------|--------|-------------|--------------------------------------------------------|-------|-------------------------------------------------------------|-------------------|-----------------------|
| <b>Chang 2015</b>           | (39) | RC     | PSW         | GI bleeding                                            | DRV   | US / IMS health lifelink health plan claims database        | Oct 2010-Mar 2012 | 47 d                  |
| <b>Engelberger 2015</b>     | (40) | PC     | Crude rates | Stroke/SE, Major bleeding                              | R     | CH / 115 primary care physicians                            | Jan 2012-May 2013 | 96 d                  |
| <b>Graham 2015</b>          | (41) | RC     | PSM         | Stroke, IC bleeding, Deaths, Hospitalized bleeding, MI | DV    | US / Medicare database                                      | Oct 2010-Dec 2012 | 62 d                  |
| <b>Granziera 2015</b>       | (42) | RR     | Crude rates | Major bleeding, IC bleeding, GI bleeding               | V     | Italy / Anticoagulation Centre at Padua University Hospital | Jan 2007-Jan 2012 | 2.2 y                 |
| <b>Hernandez 2015</b>       | (43) | RC     | PSW         | Major bleeding, IC bleeding                            | DV    | US / Medicare database                                      | Oct 2010-Oct 2011 | 7 m                   |
| <b>Ho 2015</b>              | (44) | RC     | Crude rates | Stroke/SE, IC bleeding, Deaths                         | DV    | Hong Kong / Hospital based registry                         | Jul 1997-Dec 2012 | 3.0 y                 |
| <b>Jacobs Abstract 2015</b> | (45) | RC     | PSM         | Stroke/TIA, Major bleeding, Deaths                     | DV    | US                                                          | Jun 2010-Dec 2014 | 6 m                   |
| <b>Kamble Abstract 2015</b> | (46) | RC     | CA          | Major bleeding                                         | DRAV  | US / MarketScan commercial & Medicare databases             | Jan 2012-Dec 2013 | 4 m                   |
| <b>Lauffenburger 2015</b>   | (47) | RC     | PSW         | Stroke, GI bleeding, MI                                | DV    | US / MarketScan commercial & Medicare databases             | Oct 2010-Dec 2012 | 12 m                  |

| Study                          | Ref  | Design | Methodology | Evaluated endpoints                      | Drugs | Region/data source                                                                                           | Enrollment period                      | Duration of follow up |
|--------------------------------|------|--------|-------------|------------------------------------------|-------|--------------------------------------------------------------------------------------------------------------|----------------------------------------|-----------------------|
| <b>Leef 2015</b>               | (48) | RC     | PSM         | Deaths                                   | DV    | US / University of Pittsburgh Medical Center                                                                 | Jan 2006-Nov 2013                      | 3.5 y                 |
| <b>Lin Abstract 2015</b>       | (49) | RC     | CA          | Major bleeding                           | DRAV  | US / Humedica de-identified Electronic Health Record database                                                | Jan 2013-Jun 2014                      | 6 m                   |
| <b>Maura 2015</b>              | (50) | RC     | PSM         | Stroke/SE, Bleeding                      | DRV   | France / Nationwide French National Health Insurance information system & French Hospital Discharge database | Jul 2011-Nov 2011<br>Jul 2012-Nov 2012 | 83 d                  |
| <b>Sjögren 2015</b>            | (51) | RR     | Crude rates | Stroke/SE/TIA, IC bleeding, Bleeding, MI | V     | Sweden / Auricula, Swedish national register for atrial fibrillation & Patient register                      | Jan 2006-Dec 2011                      | 2.8 y                 |
| <b>Tamayo 2015</b>             | (52) | PR     | Crude rates | Major bleeding, IC bleeding              | R     | US / Department of Defense EMRs                                                                              | Jan 2013-March 2014                    | 8 m                   |
| <b>Verdecchia 2015</b>         | (53) | PR     | Crude rates | Stroke, Major bleeding                   | D     | Italy / Umbria AF registry                                                                                   | Jul 2013-?                             | 6 m                   |
| <b>Adeboyeje Abstract 2016</b> | (54) | RC     | PSW         | Stroke/SE, Major bleeding                | DRAV  | US / U.S. commercial claims database                                                                         | Nov 2010-Feb 2015                      | 10 m                  |

| Study                            | Ref  | Design | Methodology | Evaluated endpoints                                              | Drugs | Region/data source                                                                              | Enrollment period   | Duration of follow up |
|----------------------------------|------|--------|-------------|------------------------------------------------------------------|-------|-------------------------------------------------------------------------------------------------|---------------------|-----------------------|
| <b>Arihiro 2016</b>              | (55) | PC     | PSW         | Stroke/SE, Major bleeding, IC bleeding, Deaths                   | DV    | Japan /18 stroke centers across Japan                                                           | Sep 2011-Mar 2014   | 91 d                  |
| <b>Avgil-Tsadok 2016</b>         | (56) | PC     | PSW         | Stroke/TIA, Major bleeding, IC bleeding, GI bleeding             | DV    | Canada / Quebec health databases                                                                | Apr 2011-Mar 2013   | 2.5 y                 |
| <b>Blin 2016</b>                 | (57) | RR     | Crude rates | Major bleeding, Deaths, MI                                       | V     | France /Echantillon Généraliste de Bénéficiaires healthcare claims and hospitalization database | Jan 2007-Dec 2011   | 2.4 y                 |
| <b>Camm (XANTUS) 2016</b>        | (58) | PC     | Crude rates | Stroke, Stroke/SE, Major bleeding, IC bleeding, Deaths, MI, NMCR | R     | International / Multicenter                                                                     | Jun 2012-Dec 2013   | 11 m                  |
| <b>Chan EW 2016</b>              | (59) | RR     | PSM         | Stroke, IC bleeding, GI bleeding, Deaths                         | V     | Hong-Kong / Hospital Authority database                                                         | Jan 2010-March 2013 | 1.8 y                 |
| <b>Chan YH 2016a</b>             | (60) | RC     | PSM         | Stroke/SE, Major bleeding, IC bleeding, GI bleeding, Deaths, MI  | DRV   | Taiwan / National Health Insurance Research Database                                            | Feb 2013-Dec 2013   | 12 m                  |
| <b>Chan YH 2016b</b>             | (61) | RC     | PSW         | Stroke, Major bleeding, IC bleeding, GI bleeding, Deaths, MI     | DV    | Taiwan / National Health Insurance Research Database                                            | Jun 2012-Dec 2013   | 8 m                   |
| <b>Coleman (REVISIT-US) 2016</b> | (62) | RC     | PSM         | Stroke, IC bleeding                                              | RAV   | US / MarketScan claims databases                                                                | Jan 2012-Oct 2014   | 9 m                   |
| <b>Coleman (RELIEF) 2016</b>     | (63) | RC     | PSM         | Stroke/SE/CH/MI, IC bleeding                                     | RV    | Germany / Primary Care Physician                                                                | Jan 2012-Oct 2013   | 12 m                  |

| Study                       | Ref  | Design | Methodology | Evaluated endpoints                                                       | Drugs | Region/data source                               | Enrollment period  | Duration of follow up |
|-----------------------------|------|--------|-------------|---------------------------------------------------------------------------|-------|--------------------------------------------------|--------------------|-----------------------|
|                             |      |        |             |                                                                           |       | Panel longitudinal database                      |                    |                       |
| <b>Ellis 2016</b>           | (64) | RC     | Crude rates | Major bleeding, IC bleeding, GI bleeding                                  | DRV   | Israel / Israeli Clalit Health Services database | Jan 2012-Jun 2013  | 8 m                   |
| <b>Gorst-Rasmussen 2016</b> | (65) | PC     | PSW         | Stroke/SE/TIA, IC bleeding, GI bleeding, Deaths, MI                       | DRV   | Denmark / Merged nationwide registries           | Feb 2012 -Aug 2014 | 2.2 y                 |
| <b>Graham 2016</b>          | (66) | RC     | PSW         | Stroke, Major bleeding, IC bleeding, GI bleeding, Deaths, MI              | DR    | US / Medicare database                           | Nov 2011-Jun 2014  | 4 m                   |
| <b>Hecker 2016</b>          | (67) | PR     | Crude rates | Stroke/SE/TIA, Major bleeding, IC bleeding, Acute coronary syndrome, NMCR | R     | Germany / Dresden NOAC Registry                  | Oct 2011-Feb 2013  | 2.2 y                 |
| <b>Korenstra 2016</b>       | (68) | RC     | PSM         | Stroke/SE, Major bleeding                                                 | DV    | Netherlands / Martini Hospital Groningen         | Jan 2010-Dec 2012  | 1.5 y                 |
| <b>Kwon 2016</b>            | (69) | RC     | CA          | Stroke/SE, Major bleeding                                                 | DV    | South Korea / Hospital database                  | Jan 2011-Sep 2014  | 12 m                  |
| <b>Larsen 2016</b>          | (70) | RC     | PSW         | Stroke/SE, Major bleeding, IC bleeding, Deaths                            | DRAV  | Denmark / Merged nationwide registries           | Aug 2011- Oct 2015 | 10 m                  |
| <b>Lip 2016a</b>            | (71) | RC     | PSM         | Major bleeding                                                            | DRAV  | US / MarketScan and Medicare databases           | Jan 2013-Dec 2014  | 4 m                   |
| <b>Lip 2016b</b>            | (72) | RC     | CA          | Major bleeding                                                            | DRAV  | US / MarketScan and Medicare databases           | Jan 2013-Dec 2013  | 8 m                   |

| Study                  | Ref  | Design | Methodology | Evaluated endpoints                                          | Drugs | Region/data source                             | Enrollment period  | Duration of follow up |
|------------------------|------|--------|-------------|--------------------------------------------------------------|-------|------------------------------------------------|--------------------|-----------------------|
| <b>Nishtala 2016</b>   | (73) | RC     | PSM         | IC bleeding, GI bleeding, Bleeding                           | DV    | NZ / National Minimum Dataset                  | Jul 2011-Dec 2012  | 9 m                   |
| <b>Noseworthy 2016</b> | (74) | RC     | PSM         | Stroke/SE, Major bleeding, IC bleeding                       | DRA   | US / OptumLabs Data Warehouse database         | Oct 2010-Feb 2015  | 10 m                  |
| <b>Seeger 2016</b>     | (75) | SC     | PSM         | Stroke/SE, Major bleeding, IC bleeding, GI bleeding, MI      | DV    | US / MarketScan and Clinformatics databases    | Oct 2010-Dec 2012  | 5 m                   |
| <b>Tziomalos 2016</b>  | (76) | PC     | Crude rates | Stroke, Deaths, MI                                           | DV    | Greece / Single hospital database              | Sep 2010 -Jun 2013 | 12 m                  |
| <b>Villines 2016</b>   | (77) | RC     | PSM         | Stroke, Major bleeding, IC bleeding, Deaths, MI              | DV    | US / Departement of Defense claims database    | Oct 2010-Jul 2012  | 8 m                   |
| <b>Yao 2016</b>        | (78) | RC     | PSM         | Stroke/SE, Major bleeding, IC bleeding                       | DRAV  | US / OptumLabs Data Warehouse database         | Oct 2010-Jun 2015  | 11 m                  |
| <b>Yap 2016</b>        | (79) | RC     | CA          | Stroke, Major bleeding, GI bleeding                          | DV    | Malaysia / Malaysia's National Heart Institute | Jan 2009-Dec 2013  | 11 m                  |
| <b>Yavuz 2016</b>      | (80) | PC     | UA          | Stroke, Major bleeding, IC bleeding, GI bleeding, Deaths, MI | DV    | Turkey / Four hospitals                        | May 2013-Nov 2014  | 11 m                  |
| <b>Yoshimura 2016</b>  | (81) | PC     | PSW         | Stroke/TIA, Major bleeding, IC bleeding, Deaths              | DV    | Japan / SAMURAI-NVAF registry                  | Sep 2011-Mar 2014  | 12 m                  |
| <b>Abraham 2017</b>    | (82) | RC     | PSM         | GI bleeding                                                  | DRA   | US / OptumLabs Data Warehouse database         | Oct 2010-Feb 2015  | 8 m                   |

| Study                          | Ref  | Design | Methodology | Evaluated endpoints                                 | Drugs | Region/data source                                       | Enrollment period | Duration of follow up |
|--------------------------------|------|--------|-------------|-----------------------------------------------------|-------|----------------------------------------------------------|-------------------|-----------------------|
| <b>Adeboyeje 2017</b>          | (83) | RC     | PSW         | IC bleeding, GI bleeding                            | DRAV  | US / HealthCore Integrated Research Environment database | Nov 2010-Feb 2015 | 2.3 y                 |
| <b>Amin 2017</b>               | (84) | RC     | PSM         | Stroke/SE, Major bleeding                           | DRAV  | US / Medicare database                                   | Jan 2013-Dec 2014 | 6 m                   |
| <b>Bengtson 2017</b>           | (85) | RC     | PSW         | Stroke, IC bleeding, GI bleeding, MI                | DV    | US / MarketScan databases                                | Jan 2009-Dec 2012 | 1.7 y                 |
| <b>Cha 2017</b>                | (86) | RC     | PSM         | Stroke, IC bleeding, Deaths                         | DRAV  | Korea / National Health Insurance Service database       | Jan 2014-Dec 2015 | 9 m                   |
| <b>Coleman (REASSESS) 2017</b> | (87) | RC     | PSM         | Stroke, Major bleeding, IC bleeding, MI             | AV    | Germany / Primary Care Physician panel                   | Jan 2013-Aug 2014 | 11 m                  |
| <b>Coleman 2017</b>            | (88) | RC     | PSM         | Stroke, IC bleeding, MI                             | AV    | Germany / Primary Care Physician panel                   | Jan 2013-Mar 2015 | 12 m                  |
| <b>Coleman (REAFFIRM) 2017</b> | (89) | RC     | PSM         | Stroke, Major bleeding, IC bleeding                 | DRAV  | US / MarketScan databases                                | Jan 2012-Jun 2015 | 10 m                  |
| <b>Deitelzweig 2017</b>        | (90) | RC     | PSM         | Stroke/SE, Major bleeding, IC bleeding, GI bleeding | AV    | US / Medicare database                                   | Jan 2013-Sep 2015 | 7 m                   |
| <b>Denas 2017</b>              | (91) | RC     | PSM         | Stroke, IC bleeding, Deaths, MI                     | DV    | Italy / Veneto region databases                          | Jul 2013-Dec 2015 | 1.3 y                 |
| <b>Halvorsen 2017</b>          | (92) | PC     | CA          | Major bleeding, IC bleeding, GI bleeding, NMCR      | DRAV  | Norway / Norwegian Patient Registry and Norwegian        | Jan 2013-Jun 2015 | 6 m                   |



| Study                           | Ref  | Design | Methodology | Evaluated endpoints                                 | Drugs | Region/data source                                                 | Enrollment period | Duration of follow up |
|---------------------------------|------|--------|-------------|-----------------------------------------------------|-------|--------------------------------------------------------------------|-------------------|-----------------------|
|                                 |      |        |             |                                                     |       | Prescription Database                                              |                   |                       |
| <b>Hohnloser 2017</b>           | (93) | RC     | CA          | Major bleeding, GI bleeding                         | DRAV  | Germany / database from the Health Risk Institute                  | Jan 2013-Mar 2015 | 1.1 y                 |
| <b>Kohsaka 2017</b>             | (94) | RC     | PSM         | Major bleeding                                      | DRAV  | Japan / health claim and diagnostic procedure combination database | Mar 2011-Mar 2016 | 1.5 y                 |
| <b>Lamberts 2017</b>            | (95) | RC     | CA          | Major bleeding                                      | DRAV  | Denmark / Merged nationwide registries                             | Aug 2011-Dec 2015 | 1.0 y                 |
| <b>Leschke (XANTUS-DE) 2017</b> | (96) | PC     | Crude rates | Stroke/SE, Major bleeding, IC bleeding, Deaths, MI  | R     | Germany / XANTUS investigators                                     | Jun 2012-Feb 2015 | 12 m                  |
| <b>Li W-H 2017</b>              | (97) | PR     | Crude rates | Stroke, IC bleeding                                 | DRV   | Hong Kong / Hospital based registry                                | Jan 2008-Dec 2014 | 1.8 y                 |
| <b>Li X 2017</b>                | (98) | RC     | PSM         | Stroke/SE, Major bleeding, IC bleeding, GI bleeding | AV    | US / MarketScan, PharMetrics, Optum, and Humana databases          | Jan 2013-Sep 2015 | 5 m                   |
| <b>Lin 2017</b>                 | (99) | RC     | PSM         | Major bleeding                                      | DRAV  | US / IMS Pharmetrics Plus database                                 | Jan 2013-Sep 2015 | 1.0 y                 |

| Study                     | Ref   | Design | Methodology | Evaluated endpoints                      | Drugs | Region/data source                                            | Enrollment period  | Duration of follow up |
|---------------------------|-------|--------|-------------|------------------------------------------|-------|---------------------------------------------------------------|--------------------|-----------------------|
| <b>Naganuma 2017</b>      | (100) | RC     | PSM         | Stroke/SE/TIA, Major bleeding            | DV    | Japan / single hospital database                              | Mar 2011-Dec 2013  | 10 m                  |
| <b>Nielsen 2017</b>       | (101) | RC     | PSW         | Stroke/SE, Major bleeding, Deaths        | DRAV  | Denmark / Merged nationwide registries                        | Aug 2011-Feb 2016  | 1.5 y                 |
| <b>Norby 2017</b>         | (102) | RC     | PSM         | Stroke, IC bleeding, GI bleeding, MI     | DRV   | US / MarketScan database                                      | Jan 2010-Dec 2014  | 2.2 y                 |
| <b>Noseworthy 2017</b>    | (103) | RC     | Crude rates | Stroke/SE, Major bleeding                | DRAV  | US / OptumLabs Data Warehouse database                        | Jul 2006-Jun 2016  | 3.0 y                 |
| <b>Peacock 2017</b>       | (104) | RR     | Crude rates | Major bleeding, IC bleeding, GI bleeding | R     | US / US Department of Defense health care database            | Jan 2013-Jun 2015  | 1.1 y                 |
| <b>Russo-Alvarez 2017</b> | (105) | RC     | PSM         | Stroke/SE/TIA, Major bleeding            | RV    | US / Cleveland Clinic Health System database                  | Jan 2012 -Jul 2016 | 1.2 y                 |
| <b>Staerk 2017</b>        | (106) | RC     | CA          | Stroke, Stroke/SE, IC bleeding           | DRAV  | Denmark / Merged nationwide registries                        | Mar 2012-Dec 2016  | 11 m                  |
| <b>Weir 2017</b>          | (107) | RC     | PSW         | Stroke, Major bleeding                   | RV    | US / Optum's Integrated Claims-Clinical de-identified dataset | May 2011-Aug 2014  | 7 m                   |
| <b>Yamashita 2017</b>     | (108) | PC     | PSM         | Stroke/SE, Major bleeding                | DV    | Japan / Fushimi AF Registry                                   | ?-Nov 2015         | 2.7 y                 |

| Study               | Ref   | Design | Methodology | Evaluated endpoints                              | Drugs | Region/data source            | Enrollment period | Duration of follow up |
|---------------------|-------|--------|-------------|--------------------------------------------------|-------|-------------------------------|-------------------|-----------------------|
| <b>Yiginer 2017</b> | (109) | PC     | CA          | Major bleeding, IC bleeding, GI bleeding, Deaths | DR    | Turkey / 5 tertiary hospitals | NS                | 1.4 y                 |

Design: RC...retrospective cohort; PC...prospective cohort; RMC...retrospective matched cohort; SC...sequential cohort; RR...retrospective registry; PR...prospective registry study. Methodology: PSM...propensity score matching; PSW...propensity score weighting/adjustment; CA...confounder adjustment. Evaluated endpoints: SE...systemic embolism; IC...intracranial; GI...gastrointestinal; MI...myocardial infarction. AF...Atrial fibrillation; EMR...Electronic medical records
