# Supplementary material for: Safety and efficacy of direct acting oral anticoagulants and vitamin K antagonists in nonvalvular atrial fibrillation – a network meta-analysis of real-world data
Source: Atypon-hosted journal article supplement (doi:10.1024/0301-1526/a000746), 2018-10-30
Supplement: 0301-1526_a000746_esm02.pdf [file 0301-1526_a000746_esm02.pdf]

ESM 2. Supplementary Table 1b. Number of cases and patient-years of follow up for the different study arms, and endpoints evaluated. If DOACs were not differentiated the combined DOACs are indicated separated by a slash. The number after a letter indicates the dosage. Specific subgroups like treatment naïve or switching patients, age groups etc. are also indicated (Exp...experienced users).

| Study                         | Number of cases                                              |             |          |        | Patient-years                                                |             |          |        | Evaluated endpoints                             |
|-------------------------------|--------------------------------------------------------------|-------------|----------|--------|--------------------------------------------------------------|-------------|----------|--------|-------------------------------------------------|
|                               | Dabigatran                                                   | Rivaroxaban | Apixaban | VKA    | Dabigatran                                                   | Rivaroxaban | Apixaban | VKA    |                                                 |
| <b>Amin 2013</b>              |                                                              |             |          | 23525  |                                                              |             |          | 42667  | Stroke, Major bleeding                          |
| <b>Larsen 2013</b>            | D110 2739<br>D150 2239                                       |             |          | 8936   | D110 2326<br>D150 1760                                       |             |          | 8100   | Stroke, Major bleeding, IC bleeding, Deaths, MI |
| <b>Sörensen 2013</b>          | D110 1612<br>D150 1114                                       |             |          | 49640  | D110 556<br>D150 385                                         |             |          | 17136  | Major bleeding                                  |
| <b>Southworth 2013</b>        | 10599                                                        |             |          | 43541  | 2740                                                         |             |          | 12524  | IC bleeding, GI bleeding                        |
| <b>Bengtson Abstract 2014</b> | 32918                                                        | 3301        |          | 185266 | 41147                                                        | 1651        |          | 277900 | Stroke, IC bleeding, GI bleeding                |
| <b>Beyer-Westendorf 2014</b>  |                                                              | 1200        |          |        |                                                              | 1175        |          |        | Major bleeding, NMCR                            |
| <b>Fontaine 2014</b>          | 1906                                                         | 691         |          |        | 3812                                                         | 1382        |          |        | Major bleeding                                  |
| <b>Laliberte 2014</b>         |                                                              | 3654        |          | 14616  |                                                              | 831         |          | 4525   | Stroke/SE, Major bleeding, IC bleeding          |
| <b>Larsen 2014</b>            | D110Exp 2038<br>D110New 3045<br>D150Exp 2214<br>D150New 4018 |             |          | 45260  | D110Exp 2118<br>D110New 2733<br>D150Exp 2714<br>D150New 3828 |             |          | 45948  | Major bleeding, IC bleeding                     |
| <b>Navgren 2014</b>           |                                                              |             |          | 4400   |                                                              |             |          | 8394   | Major bleeding, IC bleeding                     |
| <b>Ogawa 2014</b>             |                                                              | 1034        |          |        |                                                              | 517         |          |        | Stroke, Major bleeding, MI, NMCR                |
| <b>Siu 2014</b>               |                                                              |             |          | 1912   |                                                              |             |          | 6097   | IC bleeding                                     |

| Study                       | Number of cases      |                         |          |             | Patient-years        |                       |          |              | Evaluated endpoints                                    |
|-----------------------------|----------------------|-------------------------|----------|-------------|----------------------|-----------------------|----------|--------------|--------------------------------------------------------|
|                             | Dabigatran           | Rivaroxaban             | Apixaban | VKA         | Dabigatran           | Rivaroxaban           | Apixaban | VKA          |                                                        |
| <b>Tran 2014</b>            | 172                  |                         |          |             | 144                  |                       |          |              | GI bleeding                                            |
| <b>Yap 2014</b>             | D110 206<br>D150 304 |                         |          |             | D110 164<br>D150 242 |                       |          |              | Major bleeding                                         |
| <b>Abraham 2015</b>         | 7749                 | 5166                    |          | 12915       | 6509                 | 4339                  |          | 10849        | Stroke, GI bleeding                                    |
| <b>Avgil-Tsadok 2015</b>    | 10657                |                         |          | 49202       | 6217                 |                       |          | 28701        | Stroke, Bleeding, Deaths, MI                           |
| <b>Bouillon 2015</b>        | Switch 4370          | Switch 2335             |          | 10705       | Switch 3642          | Switch 1946           |          | 8921         | Stroke/SE, Major bleeding, MI                          |
| <b>Chang 2015</b>           | 4907                 | 1649                    |          | 39607       | 1354                 | 117                   |          | 9007         | GI bleeding                                            |
| <b>Engelberger 2015</b>     |                      | Switch 301<br>Naive 236 |          |             |                      | Switch 80<br>Naive 61 |          |              | Stroke/SE, Major bleeding                              |
| <b>Graham 2015</b>          | 67494                |                         |          | 273920      | 18205                |                       |          | 19382        | Stroke, IC bleeding, Deaths, Hospitalized bleeding, MI |
| <b>Granziera 2015</b>       |                      |                         |          | Elderly 798 |                      |                       |          | Elderly 1912 | Major bleeding, IC bleeding, GI bleeding               |
| <b>Hernandez 2015</b>       | 1302                 |                         |          | 8102        | 631                  |                       |          | 5061         | Major bleeding, IC bleeding                            |
| <b>Ho 2015</b>              | 393                  |                         |          | 1438        | 1179                 |                       |          | 4314         | Stroke/SE, IC bleeding, Deaths                         |
| <b>Jacobs Abstract 2015</b> | D/R/A 2627           |                         |          | 2627        | D/R/A 1314           |                       |          | 1314         | Stroke/TIA, Major bleeding, Deaths                     |
| <b>Kamble Abstract 2015</b> | 3768                 | 8066                    | 2057     | 12713       | 1308                 | 2601                  | 509      | 3556         | Major bleeding                                         |

| Study                          | Number of cases                                                                  |             |          |       | Patient-years                                                                     |             |          |        | Evaluated endpoints                                              |
|--------------------------------|----------------------------------------------------------------------------------|-------------|----------|-------|-----------------------------------------------------------------------------------|-------------|----------|--------|------------------------------------------------------------------|
|                                | Dabigatran                                                                       | Rivaroxaban | Apixaban | VKA   | Dabigatran                                                                        | Rivaroxaban | Apixaban | VKA    |                                                                  |
| <b>Lauffenburger 2015</b>      | 21070                                                                            |             |          | 43865 | 20666                                                                             |             |          | 43024  | Stroke, GI bleeding, MI                                          |
| <b>Leef 2015</b>               |                                                                                  | D/R/A 554   |          | 554   | D/R/A 1962                                                                        |             |          | 1962   | Deaths                                                           |
| <b>Lin Abstract 2015</b>       | 2440                                                                             | 6407        | 2038     | 24872 | 1220                                                                              | 3204        | 1019     | 12436  | Major bleeding                                                   |
| <b>Maura 2015</b>              | 8443                                                                             | 4651        |          | 25315 | 1684                                                                              | 328         |          | 5205   | Stroke/SE, Bleeding                                              |
| <b>Sjögren 2015</b>            |                                                                                  |             |          | 68792 |                                                                                   |             |          | 193524 | Stroke/SE/TIA, IC bleeding, Bleeding, MI                         |
| <b>Tamayo 2015</b>             |                                                                                  | 27467       |          |       | 17343                                                                             |             |          |        | Major bleeding, IC bleeding                                      |
| <b>Verdecchia 2015</b>         | 115                                                                              |             |          |       | 57                                                                                |             |          |        | Stroke, Major bleeding                                           |
| <b>Adeboyeje Abstract 2016</b> | 8539                                                                             | 8398        | 3689     | 23431 | 8775                                                                              | 6003        | 1894     | 28740  | Stroke/SE, Major bleeding                                        |
| <b>Arihiro 2016</b>            |                                                                                  | D/R/A 475   |          | 662   | D/R/A 119                                                                         |             |          | 166    | Stroke/SE, Major bleeding, IC bleeding, Deaths                   |
| <b>Avgil-Tsadok 2016</b>       | D110 (<75 y) 1277<br>D110 (>75 y) 5093<br>D150 (<75 y) 7649<br>D150 (>75 y) 1899 |             |          | 47192 | D110 (<75 y) 2029<br>D110 (>75 y) 8093<br>D150 (<75 y) 12155<br>D150 (>75 y) 3018 |             |          | 74990  | Stroke/TIA, Major bleeding, IC bleeding, GI bleeding             |
| <b>Blin 2016</b>               |                                                                                  |             |          | 3345  |                                                                                   |             |          | 8083   | Major bleeding, Deaths, MI                                       |
| <b>Camm (XANTUS) 2016</b>      |                                                                                  | 6784        |          |       | 6211                                                                              |             |          |        | Stroke, Stroke/SE, Major bleeding, IC bleeding, Deaths, MI, NMCR |

| Study                     | Number of cases        |                     |          |       | Patient-years          |                     |          |       | Evaluated endpoints                                                       |
|---------------------------|------------------------|---------------------|----------|-------|------------------------|---------------------|----------|-------|---------------------------------------------------------------------------|
|                           | Dabigatran             | Rivaroxaban         | Apixaban | VKA   | Dabigatran             | Rivaroxaban         | Apixaban | VKA   |                                                                           |
| Chan EW 2016              |                        |                     |          | 2276  |                        |                     |          | 3985  | Stroke, IC bleeding, GI bleeding, Deaths                                  |
| Chan YH 2016              | 16423                  | 3916                |          | 16423 | 7178                   | 1180                |          | 7178  | Stroke/SE, Major bleeding, IC bleeding, GI bleeding, Deaths, MI           |
| Chan Y-H 2016             | 9940                   |                     |          | 9913  | 6660                   |                     |          | 6642  | Stroke, Major bleeding, IC bleeding, GI bleeding, Deaths, MI              |
| Coleman (REVISIT-US) 2016 |                        | 11411               | 4083     | 15494 |                        | 7715                | 2125     | 8222  | Stroke, IC bleeding                                                       |
| Coleman (RELIEF) 2016     |                        | 1039                |          | 1039  |                        | 1015                |          | 1005  | Stroke/SE/CH/MI, IC bleeding                                              |
| Ellis 2016                | D110 4170<br>D150 1806 | 2709                |          | 9564  | D110 3215<br>D150 1079 | 1086                |          | 9451  | Major bleeding, IC bleeding, GI bleeding                                  |
| Gorst-Rasmussen 2016      | 19953                  | R15 776<br>R20 1629 |          | 19953 | 24382                  | R15 623<br>R20 1464 |          | 24382 | Stroke/SE/TIA, IC bleeding, GI bleeding, Deaths, MI                       |
| Graham 2016               | 52240                  | 66651               |          |       | 15524                  | 20199               |          |       | Stroke, Major bleeding, IC bleeding, GI bleeding, Deaths, MI              |
| Hecker 2016               |                        | 1204                |          |       |                        | 2626                |          |       | Stroke/SE/TIA, Major bleeding, IC bleeding, Acute coronary syndrome, NMCR |
| Korenstra 2016            | 383                    |                     |          | 383   | 574                    |                     |          | 574   | Stroke/SE, Major bleeding                                                 |

| Study                  | Number of cases    |             |          |       | Patient-years      |             |          |       | Evaluated endpoints                                     |
|------------------------|--------------------|-------------|----------|-------|--------------------|-------------|----------|-------|---------------------------------------------------------|
|                        | Dabigatran         | Rivaroxaban | Apixaban | VKA   | Dabigatran         | Rivaroxaban | Apixaban | VKA   |                                                         |
| <b>Kwon 2016</b>       | D/R 148            |             |          | 145   | D/R 135            |             |          | 155   | Stroke/SE, Major bleeding                               |
| <b>Larsen 2016</b>     | 12701              | 7192        | 6349     | 35436 | 11799              | 5291        | 4322     | 30579 | Stroke/SE, Major bleeding, IC bleeding, Deaths          |
| <b>Lip 2016a</b>       | 4173               | 10050       | 2402     | 12713 | 1449               | 3241        | 595      | 4443  | Major bleeding                                          |
| <b>Lip 2016b</b>       | 4515               | 12625       | 6964     | 24104 | 2253               | 5967        | 3415     | 10736 | Major bleeding                                          |
| <b>Nishtala 2016</b>   | 4385               |             |          | 6768  | 2754               |             |          | 3811  | IC bleeding, GI bleeding, Bleeding                      |
|                        | D110 3396          |             |          |       | D110 2037          |             |          |       |                                                         |
|                        | D150 2153          |             |          |       | D150 1434          |             |          |       |                                                         |
| <b>Noseworthy 2016</b> | 28894              | 15787       | 6542     |       | 14447              | 7894        | 3271     |       | Stroke/SE, Major bleeding, IC bleeding                  |
| <b>Seeger 2016</b>     | 19189              |             |          | 19189 | 8059               |             |          | 6448  | Stroke/SE, Major bleeding, IC bleeding, GI bleeding, MI |
| <b>Tziomalos 2016</b>  | D110 (post stroke) |             |          | 74    | D110 (post stroke) |             |          | 74    | Stroke, Deaths, MI                                      |
|                        | 9                  |             |          |       | 9                  |             |          |       |                                                         |
| <b>Villines 2016</b>   | 12793              |             |          | 12793 | 9789               |             |          | 7613  | Stroke, Major bleeding, IC bleeding, Deaths, MI         |
| <b>Yao 2016</b>        | 14307              | 16175       | 7695     | 38177 | 10015              | 9705        | 3847     | 23567 | Stroke/SE, Major bleeding, IC bleeding                  |
| <b>Yap 2016</b>        | 500                |             |          | 500   | 432                |             |          | 486   | Stroke, Major bleeding, GI bleeding                     |

| Study                          | Number of cases       |             |          |        | Patient-years         |             |          |        | Evaluated endpoints                                          |
|--------------------------------|-----------------------|-------------|----------|--------|-----------------------|-------------|----------|--------|--------------------------------------------------------------|
|                                | Dabigatran            | Rivaroxaban | Apixaban | VKA    | Dabigatran            | Rivaroxaban | Apixaban | VKA    |                                                              |
| <b>Yavuz 2016</b>              | D110 280<br>D150 101  |             |          | 174    | D110 257<br>D150 93   |             |          | 160    | Stroke, Major bleeding, IC bleeding, GI bleeding, Deaths, MI |
| <b>Yoshimura 2016</b>          |                       | D/R/A 466   |          | 650    | D/R/A 466             |             |          | 650    | Stroke/TIA, Major bleeding, IC bleeding, Deaths              |
| <b>Abraham 2017</b>            | 28894                 | 28894       | 6542     |        | 8945                  | 8945        | 1595     |        | GI bleeding                                                  |
| <b>Adeboyeje 2017</b>          | 48907                 | 8398        | 3689     | 48907  | 53303                 | 6083        | 1906     | 53303  | IC bleeding, GI bleeding                                     |
| <b>Amin 2017</b>               | 16731                 | 52476       | 20803    | 90010  | 5180                  | 18690       | 6554     | 29981  | Stroke/SE, Major bleeding                                    |
| <b>Bengtson 2017</b>           | 18981<br>Switch 13937 |             |          | 101167 | 23713<br>Switch 17412 |             |          | 126389 | Stroke, IC bleeding, GI bleeding, MI                         |
| <b>Cha 2017</b>                | 3741                  | 5681        | 2189     | 23222  | 2058                  | 2840        | 876      | 35065  | Stroke, IC bleeding, Deaths                                  |
| <b>Coleman (REASSESS) 2017</b> |                       |             | 723      | 723    |                       |             | 638      | 649    | Stroke, Major bleeding, IC bleeding, MI                      |
| <b>Coleman 2017</b>            |                       |             | 835      | 835    |                       |             | 809      | 814    | Stroke, IC bleeding, MI                                      |
| <b>Coleman (REAFFIRM) 2017</b> | 981                   | 2604        | 1257     | 4842   | 589                   | 1562        | 628      | 2780   | Stroke, Major bleeding, IC bleeding                          |
| <b>Deitelzweig 2017</b>        |                       |             | 7107     | 7107   |                       |             | 3909     | 3968   | Stroke/SE, Major bleeding, IC bleeding, GI bleeding          |
| <b>Denas 2017</b>              |                       | D/R/A 6923  |          | 33488  | D/R/A 7645            |             |          | 47428  | Stroke, IC bleeding, Deaths, MI                              |

| Study                           | Number of cases |                       |           |        | Patient-years |                       |           |        | Evaluated endpoints                                 |
|---------------------------------|-----------------|-----------------------|-----------|--------|---------------|-----------------------|-----------|--------|-----------------------------------------------------|
|                                 | Dabigatran      | Rivaroxaban           | Apixaban  | VKA    | Dabigatran    | Rivaroxaban           | Apixaban  | VKA    |                                                     |
| <b>Halvorsen 2017</b>           | 7925            | 6817                  | 6506      | 11427  | 4603          | 3903                  | 2549      | 5007   | Major bleeding, IC bleeding, GI bleeding, NMCR      |
| <b>Hohnloser 2017</b>           | 3138            | 12063                 | 3633      | 48534  | 2244          | 8527                  | 2170      | 37233  | Major bleeding, GI bleeding                         |
| <b>Kohsaka 2017</b>             | 5090            | 6726                  | 5977      | 17793  | 5020          | 6634                  | 5895      | 17549  | Major bleeding                                      |
| <b>Lamberts 2017</b>            | 15413           | 6715                  | 7963      | 24230  | 21595         | 6411                  | 5856      | 26421  | Major bleeding                                      |
| <b>Leschke (XANTUS-DE) 2017</b> |                 | 1445                  |           |        |               | 1425                  |           |        | Stroke/SE, Major bleeding, IC bleeding, Deaths, MI  |
| <b>Li W-H 2017</b>              | D110 467        | 669                   |           | 157    | D110 741      | 749                   |           | 661    | Stroke, IC bleeding                                 |
| <b>Li X 2017</b>                |                 |                       | 38470     | 38470  |               |                       | 16674     | 17464  | Stroke/SE, Major bleeding, IC bleeding, GI bleeding |
| <b>Lin 2017</b>                 | 11593           | 11593                 | 2684      | 11593  | 4581          | 4581                  | 1162      | 4581   | Major bleeding                                      |
| <b>Naganuma 2017</b>            | 181             |                       |           | 181    | 157           |                       |           | 155    | Stroke/SE/TIA, Major bleeding                       |
| <b>Nielsen 2017</b>             | D110 8875       | R15 3476              | A2.5 4400 | 38893  | D110 16996    | R15 4389              | A2.5 4370 | 73608  | Stroke/SE, Major bleeding, Deaths                   |
| <b>Norby 2017</b>               | 106357          | 16957<br>Switch 11845 |           | 106357 | 107245        | 21633<br>Switch 11681 |           | 107245 | Stroke, IC bleeding, GI bleeding, MI                |
| <b>Noseworthy 2017</b>          | 9412            | 16208                 | 12949     | 68804  | 28236         | 48624                 | 38847     | 206412 | Stroke/SE, Major bleeding                           |

| Study                     | Number of cases |             |          |       | Patient-years |             |          |       | Evaluated endpoints                              |
|---------------------------|-----------------|-------------|----------|-------|---------------|-------------|----------|-------|--------------------------------------------------|
|                           | Dabigatran      | Rivaroxaban | Apixaban | VKA   | Dabigatran    | Rivaroxaban | Apixaban | VKA   |                                                  |
| <b>Peacock 2017</b>       |                 | 32754       |          |       |               | 35895       |          |       | Major bleeding, IC bleeding, GI bleeding         |
| <b>Russo-Alvarez 2017</b> |                 | 472         |          | 472   |               | 354         |          | 786   | Stroke/SE/TIA, Major bleeding                    |
| <b>Staerk 2017</b>        | 12613           | 5693        | 6899     | 18094 | 14479         | 4445        | 4347     | 17450 | Stroke, Stroke/SE, IC bleeding                   |
| <b>Weir 2017</b>          |                 | 1290        |          | 2468  |               | 696         |          | 1522  | Stroke, Major bleeding                           |
| <b>Yamashita 2017</b>     |                 | D/R/A 270   |          | 1728  |               | D/R/A 740   |          | 4734  | Stroke/SE, Major bleeding                        |
| <b>Yiginer 2017</b>       | 95              | 88          |          |       | 135           | 125         |          |       | Major bleeding, IC bleeding, GI bleeding, Deaths |

SE...systemic embolism; TIA...transient ischemic attack; IC bleeding...intracranial bleeding; GI bleeding...gastrointestinal bleeding, NMCR...non-major clinical relevant
