# Supplementary material for: Safety and efficacy of direct acting oral anticoagulants and vitamin K antagonists in nonvalvular atrial fibrillation – a network meta-analysis of real-world data
Source: Atypon-hosted journal article supplement (doi:10.1024/0301-1526/a000746), 2018-10-30
Supplement: 0301-1526_a000746_esm03.pdf [file 0301-1526_a000746_esm03.pdf]

| Study                       | Subgroup/Comments                | Males % |      |      |      | Age (average) |      |      |      | CHA <sub>2</sub> DS <sub>2</sub> VASc (average) |      |      |      | HAS-BLED (average) |      |   |      |
|-----------------------------|----------------------------------|---------|------|------|------|---------------|------|------|------|-------------------------------------------------|------|------|------|--------------------|------|---|------|
|                             |                                  | D       | R    | A    | VKA  | D             | R    | A    | VKA  | D                                               | R    | A    | VKA  | D                  | R    | A | VKA  |
| <b>Avgil-Tsadok 2015</b>    | Only differentiated by gender    |         |      |      |      |               |      |      |      |                                                 |      |      |      |                    |      |   |      |
| <b>Bouillon 2015</b>        | Only differentiated by switching |         |      |      |      |               |      |      |      |                                                 |      |      |      |                    |      |   |      |
| <b>Chang 2015</b>           | V-D                              | 69.1    | 48.5 |      | 53.1 | 62.0          | 57.6 |      | 57.4 |                                                 |      |      |      |                    |      |   |      |
| <b>Engelberger 2015</b>     | R Switch                         |         | 59.1 |      |      |               | 74.6 |      |      |                                                 | 3.92 |      |      |                    | 2.46 |   |      |
| <b>Engelberger 2015</b>     | R Naive                          |         | 54.2 |      |      |               | 71.6 |      |      |                                                 | 3.62 |      |      |                    | 2.33 |   |      |
| <b>Graham 2015</b>          | V-D                              | 49.0    |      |      | 48.0 |               |      |      |      |                                                 |      |      |      |                    |      |   |      |
| <b>Granziera 2015</b>       | V 80-84 y                        |         |      |      | 43.2 |               |      |      | 82.0 |                                                 |      |      |      | 2.51               |      |   |      |
| <b>Granziera 2015</b>       | V ≥85 y                          |         |      |      | 33.7 |               |      |      | 87.0 |                                                 |      |      |      | 2.72               |      |   |      |
| <b>Hernandez 2015</b>       | V-D                              | 42.1    |      |      | 41.0 | 75.1          |      |      | 75.6 |                                                 |      |      |      |                    |      |   |      |
| <b>Ho 2015</b>              | V-D                              | 54.2    |      |      | 52.5 | 74.5          |      |      | 76.2 | 4.10                                            |      |      | 4.20 | 2.30               |      |   | 2.30 |
| <b>Jacobs Abstract 2015</b> | No data                          |         |      |      |      |               |      |      |      |                                                 |      |      |      |                    |      |   |      |
| <b>Kamble Abstract 2015</b> | No data                          |         |      |      |      |               |      |      |      |                                                 |      |      |      |                    |      |   |      |
| <b>Lauffenburger 2015</b>   | V-D                              | 59.2    |      |      | 59.9 | 67.5          |      |      | 71.4 | 2.30                                            |      |      | 2.90 |                    |      |   |      |
| <b>Leef 2015</b>            | V-D/R/A                          | 65.0    | 65.0 | 65.0 | 67.0 | 64.3          | 64.3 | 64.3 | 63.6 | 2.10                                            | 2.10 | 2.10 | 2.20 |                    |      |   |      |
| <b>Lin Abstract 2015</b>    | V-A                              | 57.0    | 55.2 | 53.7 |      | 70.5          | 69.8 | 70.9 | 74.0 | 2.80                                            | 2.70 | 2.80 | 3.20 |                    |      |   |      |
| <b>Maura 2015</b>           | V-D                              | 54.0    |      |      | 54.0 | 74.0          |      |      | 73.9 | 3.20                                            |      |      | 3.20 | 2.30               |      |   | 2.30 |
| <b>Maura 2015</b>           | V-R                              |         | 55.0 |      | 55.0 |               | 73.6 |      | 73.4 |                                                 | 3.10 |      | 3.10 |                    | 2.30 |   | 2.20 |
| <b>Sjögren 2015</b>         |                                  |         |      |      | 60.3 |               |      |      | 69.8 |                                                 |      |      |      |                    |      |   |      |
| <b>Tamayo 2015</b>          |                                  |         | 55.5 |      |      |               | 75.7 |      |      |                                                 | 3.70 |      |      |                    |      |   |      |

| Study                     | Subgroup/Comments | Males % |      |      |      | Age (average) |      |      |      | CHA <sub>2</sub> DS <sub>2</sub> VASc (average) |      |      |      | HAS-BLED (average) |      |      |      |
|---------------------------|-------------------|---------|------|------|------|---------------|------|------|------|-------------------------------------------------|------|------|------|--------------------|------|------|------|
|                           |                   | D       | R    | A    | VKA  | D             | R    | A    | VKA  | D                                               | R    | A    | VKA  | D                  | R    | A    | VKA  |
| Verdecchia 2015           |                   | 47.0    |      |      |      | 80.0          |      |      |      | 4.00                                            |      |      |      | 2.00               |      |      |      |
| Adeboyeje Abstract 2016   | No data           |         |      |      |      | 66.0          | 67.0 | 69.0 | 73.0 |                                                 |      |      |      |                    |      |      |      |
| Arihiro 2016              | V-D/R/A           | 51.2    | 51.2 | 51.2 | 64.4 | 74.4          | 74.4 | 74.4 | 79.3 | 5.00                                            | 5.00 | 5.00 | 6.00 | 3.00               | 3.00 | 3.00 | 3.00 |
| Avgil-Tsadok 2016         | V-D110 (<75 y)    | 58.5    |      |      | 61.5 |               |      |      |      | 2.40                                            |      |      | 2.30 | 2.40               |      |      | 2.40 |
| Avgil-Tsadok 2016         | V-D150 (<75 y)    | 64.7    |      |      | 61.5 |               |      |      |      | 2.00                                            |      |      | 2.30 | 2.00               |      |      | 2.40 |
| Avgil-Tsadok 2016         | V-D110 (≥75 y)    | 42.8    |      |      | 43.1 |               |      |      |      | 3.70                                            |      |      | 3.80 | 3.70               |      |      | 3.80 |
| Avgil-Tsadok 2016         | V-D150 (≥75 y)    | 54.4    |      |      | 43.1 |               |      |      |      | 3.20                                            |      |      | 3.80 | 3.20               |      |      | 3.80 |
| Blin 2016                 |                   |         |      |      | 51.7 |               |      |      | 75.1 |                                                 |      |      |      |                    |      |      | 1.75 |
| Camm (XANTUS) 2016        |                   |         | 59.2 |      |      |               |      | 71.5 |      |                                                 |      | 3.40 |      |                    |      |      |      |
| Chan EW 2016              |                   |         |      |      | 46.7 |               |      |      | 74.3 |                                                 |      |      | 3.50 |                    |      |      |      |
| Chan YH 2016a             | V-D               | 48.0    |      |      | 48.0 | 75.0          |      |      | 75.0 | 4.08                                            |      |      | 4.12 | 3.12               |      |      | 3.19 |
| Chan YH 2016a             | V-R               |         | 46.0 |      | 46.0 |               | 76.0 |      | 76.0 |                                                 | 4.12 |      | 4.12 |                    | 3.11 |      | 3.14 |
| Chan YH 2016b             | V-D               | 58.0    |      |      | 58.0 | 75.0          |      |      | 76.0 | 4.13                                            |      |      | 4.16 | 2.57               |      |      | 2.58 |
| Coleman (REVISIT-US) 2016 | V-A               |         |      | 53.2 | 53.6 |               |      | 71.0 | 71.2 |                                                 |      | 3.47 | 3.47 |                    |      | 1.65 | 1.66 |
| Coleman (REVISIT-US) 2016 | V-R               |         | 53.6 |      | 53.9 |               | 70.8 |      | 70.2 |                                                 | 3.46 |      | 3.48 |                    | 1.62 |      | 1.62 |
| Coleman (RELIEF) 2016     | V-R               |         | 51.8 |      | 51.8 |               | 74.0 |      | 74.4 |                                                 | 3.90 |      | 3.90 |                    |      |      |      |
| Ellis 2016                | V-D110            | 53.0    |      |      | 56.2 | 82.0          |      |      | 79.0 |                                                 |      |      |      |                    |      |      |      |
| Ellis 2016                | V-D150            | 54.9    |      |      | 56.2 | 78.0          |      |      | 79.0 |                                                 |      |      |      |                    |      |      |      |
| Ellis 2016                | V-R               |         | 61.4 |      | 56.2 |               | 82.0 |      | 79.0 |                                                 |      |      |      |                    |      |      |      |
| Gorst-Rasmussen 2016      | D110-R15          | 43.2    | 40.3 |      |      | 80.8          | 82.8 |      |      | 3.80                                            | 4.20 |      |      | 2.60               | 2.80 |      |      |

| Study                | Subgroup/Comments    | Males % |      |      |      | Age (average) |      |      |      | CHA <sub>2</sub> DS <sub>2</sub> VASc (average) |      |      |      | HAS-BLED (average) |      |      |      |
|----------------------|----------------------|---------|------|------|------|---------------|------|------|------|-------------------------------------------------|------|------|------|--------------------|------|------|------|
|                      |                      | D       | R    | A    | VKA  | D             | R    | A    | VKA  | D                                               | R    | A    | VKA  | D                  | R    | A    | VKA  |
| Gorst-Rasmussen 2016 | D150-R20             | 63.5    | 51.1 |      |      | 66.0          | 72.8 |      |      | 2.10                                            | 3.00 |      |      | 1.90               | 2.30 |      |      |
| Gorst-Rasmussen 2016 | V-R15                |         | 40.3 |      | 57.0 |               | 82.8 |      | 72.6 |                                                 | 4.20 |      | 3.10 |                    | 2.80 |      | 2.40 |
| Gorst-Rasmussen 2016 | V-R20                |         | 51.1 |      | 57.0 |               | 72.8 |      | 72.6 |                                                 | 3.00 |      | 3.10 |                    | 2.30 |      | 2.40 |
| Graham 2016          | D-R                  | 53.0    | 53.0 |      |      |               | 75.0 | 75.0 |      |                                                 |      |      |      |                    |      |      |      |
| Hecker 2016          |                      |         | 52.4 |      |      |               | 75.0 |      |      |                                                 |      |      |      |                    |      |      |      |
| Korenstra 2016       | V-D                  | 53.5    |      |      | 51.2 | 70.6          |      |      | 72.3 | 2.38                                            |      | 2.70 |      | 1.90               |      |      | 1.84 |
| Kwon 2016            | V-D/R                | 49.9    | 49.9 |      | 40.7 | 84.2          | 84.2 |      | 83.2 | 4.70                                            | 4.70 |      | 4.70 | 2.60               | 2.60 |      | 2.40 |
| Larsen 2016          | V-D                  | 66.1    | 56.9 | 60.3 | 58.8 | 67.6          | 71.8 | 71.3 | 72.4 | 2.20                                            | 2.80 | 2.80 | 2.80 | 2.00               | 2.20 | 2.30 | 2.20 |
| Lip 2016a            | V-D                  | 65.8    | 63.1 | 63.2 | 60.8 | 66.8          | 67.3 | 69.3 | 72.5 | 2.58                                            | 2.62 | 2.83 | 3.22 |                    |      |      |      |
| Lip 2016b            | V-D                  | 64.2    |      |      | 63.9 | 66.9          |      |      | 67.5 | 2.60                                            |      | 2.60 |      | 2.00               |      |      | 2.00 |
| Lip 2016b            | V-R                  |         | 60.9 |      | 61.2 |               | 69.7 |      | 70.1 |                                                 | 2.90 |      | 3.00 |                    | 2.20 |      | 2.20 |
| Lip 2016b            | V-A                  |         |      | 61.0 | 61.6 |               |      | 69.1 | 69.0 |                                                 | 2.90 | 2.80 |      |                    | 2.20 |      | 2.20 |
| Nishtala 2016        | V-D                  | 53.1    |      |      | 52.0 | 77.3          |      |      | 77.4 |                                                 |      |      |      |                    |      |      |      |
| Noseworthy 2016      | D-A                  | 53.9    |      | 54.1 |      | 73.0          |      | 73.0 |      | 4.00                                            |      | 4.00 |      | 2.00               |      | 2.00 |      |
| Noseworthy 2016      | D-R                  | 58.9    | 59.7 |      |      | 71.0          | 70.0 |      |      | 4.00                                            | 4.00 |      |      | 2.00               | 2.00 |      |      |
| Noseworthy 2016      | R-A                  |         | 54.4 | 54.0 |      |               | 73.0 | 73.0 |      |                                                 | 4.00 | 4.00 |      |                    | 2.00 | 2.00 |      |
| Seeger 2016          | V-D                  | 61.8    |      |      | 62.6 | 68.7          |      |      | 68.3 | 3.06                                            |      | 3.00 |      | 2.24               |      |      | 2.21 |
| Tziomalos 2016       | V-D110 (post stroke) | 33.3    |      |      | 40.5 | 81.0          |      |      | 77.5 |                                                 |      |      |      |                    |      |      |      |
| Villines 2016        | V-D                  | 58.8    |      |      | 58.9 | 73.8          |      |      | 74.0 | 3.90                                            |      | 3.90 |      | 3.40               |      |      | 3.40 |
| Yao 2016             | V-A                  |         |      | 53.1 | 53.2 |               |      | 73.0 | 73.0 |                                                 | 4.00 | 4.00 |      |                    | 2.00 |      | 2.00 |
| Yao 2016             | V-D                  | 60.3    |      |      | 59.6 | 70.0          |      |      | 70.0 | 3.00                                            |      | 3.00 |      | 2.00               |      |      | 2.00 |

| Study                   | Subgroup/Comments | Males % |      |      |      | Age (average) |      |      |      | CHA <sub>2</sub> DS <sub>2</sub> VASc (average) |      |      |      | HAS-BLED (average) |      |      |      |
|-------------------------|-------------------|---------|------|------|------|---------------|------|------|------|-------------------------------------------------|------|------|------|--------------------|------|------|------|
|                         |                   | D       | R    | A    | VKA  | D             | R    | A    | VKA  | D                                               | R    | A    | VKA  | D                  | R    | A    | VKA  |
| Yao 2016                | V-R               |         | 56.8 |      | 56.3 |               | 72.0 |      | 72.0 |                                                 | 4.00 |      | 4.00 |                    | 2.00 |      | 2.00 |
| Yap 2016                | V-D               | 62.0    |      |      | 60.2 | 65.3          |      |      | 66.8 | 2.69                                            |      |      | 3.40 | 1.57               |      |      | 1.67 |
| Yavuz 2016              | V-D110            | 40.7    |      |      | 36.2 | 75.2          |      |      | 68.4 | 4.00                                            |      |      | 4.50 |                    |      |      |      |
| Yavuz 2016              | V-D150            | 34.7    |      |      | 36.2 | 66.2          |      |      | 68.4 | 3.00                                            |      |      | 4.50 |                    |      |      |      |
| Yoshimura 2016          | No data           |         |      |      |      |               |      |      |      |                                                 |      |      |      |                    |      |      |      |
| Abraham 2017            | R-D               | 68.9    | 59.7 |      |      | 69.7          | 69.2 |      |      | 3.70                                            | 3.60 |      |      | 2.30               | 2.20 |      |      |
| Abraham 2017            | D-A               | 53.9    |      | 54.1 |      | 72.1          |      | 72.2 |      | 4.00                                            |      | 4.00 |      | 2.40               |      | 2.40 |      |
| Abraham 2017            | R-A               |         | 54.4 | 54.0 |      |               | 72.1 | 72.3 |      |                                                 | 4.00 | 4.00 |      |                    | 2.40 | 2.40 |      |
| Adeboyeje 2017          | V-D               | 58.9    | 58.7 | 59.5 | 59.1 | 70.0          | 70.0 | 70.0 | 70.0 | 3.30                                            | 3.30 | 3.30 | 3.30 | 2.10               | 2.10 | 2.10 | 2.10 |
| Amin 2017               | V-D               | 50.6    |      |      | 51.0 | 77.2          |      |      | 77.1 | 4.40                                            |      |      | 4.50 | 3.10               |      |      | 3.20 |
| Amin 2017               | V-R               |         | 48.3 |      | 48.1 |               | 77.7 |      | 77.8 |                                                 | 4.50 |      | 4.50 |                    | 3.20 |      | 3.20 |
| Amin 2017               | V-A               |         |      | 47.7 | 47.9 |               |      | 78.4 | 78.1 |                                                 |      | 4.60 | 4.70 |                    |      | 3.30 | 3.30 |
| Bengtson 2017           | V-D               | 63.8    |      |      | 61.2 | 68.5          |      |      | 70.8 | 2.00                                            |      |      | 2.20 |                    |      |      |      |
| Bengtson 2017           | V-D Switch        | 62.1    |      |      | 62.0 | 70.9          |      |      | 71.5 | 2.40                                            |      |      | 2.40 |                    |      |      |      |
| Cha 2017                | V-D               | 58.0    | 52.7 | 54.4 | 56.9 | 69.3          | 70.5 | 70.3 | 68.8 | 3.51                                            | 3.60 | 3.57 | 3.57 |                    |      |      |      |
| Coleman (REASSESS) 2017 | V-A               |         |      | 49.7 | 50.6 |               |      | 75.8 | 75.8 |                                                 |      | 3.40 | 3.40 |                    |      |      |      |
| Coleman 2017            | V-A               |         |      | 50.1 | 52.7 |               |      | 75.3 | 74.8 |                                                 |      | 3.50 | 3.60 |                    |      |      |      |
| Coleman (REAFFIRM) 2017 | V-D               | 51.8    |      |      | 52.3 | 73.0          |      |      | 73.0 | 5.00                                            |      |      | 5.00 | 3.00               |      |      | 3.00 |
| Coleman (REAFFIRM) 2017 | V-R               |         | 53.1 |      | 53.7 |               | 72.0 |      | 73.0 |                                                 | 5.00 |      | 5.00 |                    | 3.00 |      | 3.00 |
| Coleman (REAFFIRM) 2017 | V-A               |         |      | 54.0 | 55.8 |               |      | 74.0 | 74.0 |                                                 |      | 5.00 | 5.00 |                    |      | 4.00 | 4.00 |
| Deitelzweig 2017        | D-A               | 55.0    |      | 54.8 |      | 76.9          |      | 77.3 |      | 4.30                                            |      | 4.30 |      | 2.90               |      | 2.90 |      |

| Study                    | Subgroup/Comments | Males % |      |      |      | Age (average) |      |      |      | CHA <sub>2</sub> DS <sub>2</sub> VASc (average) |      |      |      | HAS-BLED (average) |      |      |      |
|--------------------------|-------------------|---------|------|------|------|---------------|------|------|------|-------------------------------------------------|------|------|------|--------------------|------|------|------|
|                          |                   | D       | R    | A    | VKA  | D             | R    | A    | VKA  | D                                               | R    | A    | VKA  | D                  | R    | A    | VKA  |
| Deitelzweig 2017         | R-A               |         | 52.4 | 52.2 |      |               | 77.0 | 77.1 |      | 4.40                                            | 4.40 |      |      | 2.90               | 2.90 |      |      |
| Deitelzweig 2017         | V-A               |         |      | 52.6 | 51.9 |               |      | 78.2 | 78.1 |                                                 |      | 4.60 | 4.60 |                    |      | 3.00 | 3.10 |
| Denas 2017               | V-D/R/A           | 47.9    | 47.9 | 47.9 | 48.2 | 75.2          | 75.2 | 75.2 | 75.1 | 3.20                                            | 3.20 | 3.20 | 3.19 | 2.33               | 2.33 | 2.33 | 2.32 |
| Halvorsen 2017           | V-D               | 62.0    | 54.4 | 55.0 | 59.0 | 70.8          | 74.7 | 74.5 | 74.6 | 2.46                                            | 2.94 | 2.93 | 3.09 |                    |      |      |      |
| Hohnloser 2017           | V-A               |         |      | 49.2 | 49.4 |               |      | 75.5 | 75.4 |                                                 |      | 4.10 | 4.10 |                    |      | 2.90 | 2.90 |
| Hohnloser 2017           | V-D               | 51.9    |      |      | 51.9 | 72.6          |      |      | 72.8 | 3.80                                            |      |      | 3.80 | 2.60               |      |      | 2.70 |
| Hohnloser 2017           | V-R               |         | 50.9 |      | 50.3 |               | 74.2 |      | 74.6 |                                                 | 3.80 |      | 3.90 |                    | 2.70 |      | 2.70 |
| Kohsaka 2017             | V-A               |         |      | 59.4 | 58.9 |               |      | 77.4 | 77.7 |                                                 |      | 3.50 | 3.50 |                    |      |      |      |
| Kohsaka 2017             | V-D               | 65.9    |      |      | 66.1 | 73.1          |      |      | 73.3 | 3.00                                            |      |      | 3.00 |                    |      |      |      |
| Kohsaka 2017             | V-R               |         | 62.0 |      | 61.1 |               | 75.8 |      | 76.2 |                                                 | 3.30 |      | 3.40 |                    |      |      |      |
| Lamberts 2017            | V-D               | 56.7    | 52.0 | 50.8 | 58.4 | 71.5          | 74.4 | 75.4 | 72.1 | 2.73                                            | 3.02 | 3.15 | 2.91 | 2.05               | 2.21 | 2.25 | 2.18 |
| Leschke (XANTUS-DE) 2017 |                   |         | 59.0 |      |      |               | 71.6 |      |      |                                                 | 3.50 |      |      |                    |      |      |      |
| Li W-H 2017              | V-R               | 53.1    | 59.8 |      | 56.1 | 71.9          | 73.3 |      | 71.1 | 3.60                                            | 3.70 |      | 3.40 | 2.00               | 2.00 |      | 2.00 |
| Li X 2017                | V-A               |         |      | 59.7 | 59.8 |               |      | 70.9 | 70.9 |                                                 |      | 3.20 | 3.20 |                    |      | 2.60 | 2.60 |
| Lin 2017                 | D-A               | 72.5    |      | 72.5 |      | 63.0          |      | 63.0 |      | 2.10                                            |      | 2.10 |      | 2.10               |      | 2.10 |      |
| Lin 2017                 | R-A               |         | 70.4 | 70.6 |      |               | 62.0 | 62.0 |      |                                                 | 2.10 | 2.10 |      |                    | 2.20 | 2.20 |      |
| Lin 2017                 | V-A               |         |      | 67.6 | 68.6 |               |      | 63.9 | 64.0 |                                                 |      | 2.30 | 2.30 |                    |      | 2.20 | 2.20 |
| Naganuma 2017            | V-D               | 72.0    |      |      | 72.0 | 69.0          |      |      | 69.0 | 3.00                                            |      |      | 3.10 | 1.50               |      |      | 1.50 |
| Nielsen 2017             | V-D110            | 46.3    | 46.8 | 59.4 | 59.6 | 79.9          | 77.9 | 83.9 | 71.0 | 3.80                                            | 3.60 | 4.30 | 3.00 | 2.70               | 2.50 | 2.80 | 2.40 |
| Norby 2017               | D-R               | 65.8    | 65.9 |      |      | 67.2          | 67.2 |      |      | 2.60                                            | 2.60 |      |      |                    |      |      |      |
| Norby 2017               | V-R               |         | 61.3 |      | 59.9 |               | 69.3 |      | 71.1 |                                                 | 3.00 |      | 3.20 |                    |      |      |      |

| Study                     | Subgroup/Comments | Males % |      |      |      | Age (average) |      |      |      | CHA <sub>2</sub> DS <sub>2</sub> VASc (average) |      |      |      | HAS-BLED (average) |      |      |      |
|---------------------------|-------------------|---------|------|------|------|---------------|------|------|------|-------------------------------------------------|------|------|------|--------------------|------|------|------|
|                           |                   | D       | R    | A    | VKA  | D             | R    | A    | VKA  | D                                               | R    | A    | VKA  | D                  | R    | A    | VKA  |
| <b>Norby 2017</b>         | V-R Switch        |         | 60.7 |      | 60.5 |               | 71.2 |      | 71.4 |                                                 | 4.00 |      | 3.90 |                    |      |      |      |
| <b>Noseworthy 2017</b>    | V-D               | 61.3    | 58.8 | 52.0 | 57.3 | 69.0          | 71.0 | 74.0 | 73.0 | 2.90                                            | 3.00 | 3.40 | 3.40 | 1.50               | 1.60 | 1.80 | 1.80 |
| <b>Peacock 2017</b>       |                   |         | 54.3 |      |      |               | 76.6 |      |      |                                                 | 3.10 |      |      |                    |      |      |      |
| <b>Russo-Alvarez 2017</b> | V-R               |         | 61.2 |      | 63.6 |               | 73.6 |      | 73.6 |                                                 | 1.90 |      | 1.80 |                    |      |      |      |
| <b>Staerk 2017</b>        | V-D               | 55.0    | 49.9 | 49.8 | 56.7 | 71.0          | 74.0 | 76.0 | 73.0 | 2.70                                            | 2.99 | 3.11 | 2.89 | 2.00               | 2.14 | 2.20 | 2.16 |
| <b>Weir 2017</b>          | V-R               |         | 56.9 |      | 54.5 |               | 69.8 |      | 75.1 |                                                 | 3.80 |      | 4.40 |                    | 2.10 |      | 2.40 |
| <b>Yamashita 2017</b>     | V-D/R/A           | 62.0    | 62.0 | 62.0 | 62.0 | 72.0          | 72.0 | 72.0 | 74.4 | 3.20                                            | 3.20 | 3.20 | 3.70 | 1.50               | 1.50 | 1.50 | 1.70 |
| <b>Yiginer 2017</b>       | D-R               | 39.0    | 45.0 |      |      | 72.2          | 71.8 |      |      | 3.60                                            | 3.60 |      |      | 2.40               | 2.20 |      |      |

Supplementary Table 2 continued

| Study                         | Subgroup/Comments | Vascular disease % |      |   |      | Renal disease % |   |      |     | Cancer % |   |   |     | History of bleeding % |     |   |     | ASA/NSAIDs medication % |      |      |      |      |      |
|-------------------------------|-------------------|--------------------|------|---|------|-----------------|---|------|-----|----------|---|---|-----|-----------------------|-----|---|-----|-------------------------|------|------|------|------|------|
|                               |                   | D                  | R    | A | VKA  | D               | R | A    | VKA | D        | R | A | VKA | D                     | R   | A | VKA | D                       | R    | A    | VKA  |      |      |
| <b>Amin 2013</b>              |                   |                    |      |   |      |                 |   |      |     |          |   |   |     |                       |     |   |     |                         |      |      |      |      |      |
| <b>Larsen 2013</b>            | V-D110            | 24.4               |      |   | 26.4 | 2.0             |   |      | 5.1 |          |   |   |     |                       |     |   |     |                         |      | 36.0 |      |      | 41.1 |
| <b>Larsen 2013</b>            | V-D150            | 23.2               |      |   | 26.4 | 1.2             |   |      | 5.1 |          |   |   |     |                       |     |   |     |                         |      | 40.2 |      |      | 41.1 |
| <b>Sörensen 2013</b>          | V-D110            | 16.4               |      |   | 14.0 | 6.0             |   |      | 6.7 |          |   |   |     | 13.0                  |     |   |     | 10.4                    | 18.5 |      |      | 15.2 |      |
| <b>Sörensen 2013</b>          | V-D150            | 10.1               |      |   | 14.0 | 3.2             |   |      | 6.7 |          |   |   |     | 7.0                   |     |   |     | 10.4                    | 21.2 |      |      | 15.2 |      |
| <b>Southworth 2013</b>        | No data           |                    |      |   |      |                 |   |      |     |          |   |   |     |                       |     |   |     |                         |      |      |      |      |      |
| <b>Bengtson Abstract 2014</b> | No data           |                    |      |   |      |                 |   |      |     |          |   |   |     |                       |     |   |     |                         |      |      |      |      |      |
| <b>Beyer-Westendorf 2014</b>  |                   |                    |      |   |      |                 |   | 9.6  |     |          |   |   |     |                       |     |   |     |                         |      |      | 16.3 |      |      |
| <b>Fontaine 2014</b>          | No data           |                    |      |   |      |                 |   |      |     |          |   |   |     |                       |     |   |     |                         |      |      |      |      |      |
| <b>Laliberte 2014</b>         | V-R               |                    |      |   |      |                 |   | 12.2 |     | 13.0     |   |   |     |                       | 7.8 |   |     | 8.0                     |      |      |      |      |      |
| <b>Larsen 2014</b>            | V-D110 Exp        |                    |      |   |      | 4.2             |   |      | 4.4 |          |   |   |     | 22.3                  |     |   |     | 17.1                    | 29.7 |      |      | 22.8 |      |
| <b>Larsen 2014</b>            | V-D110 Naive      |                    |      |   |      | 3.3             |   |      | 5.9 |          |   |   |     | 18.6                  |     |   |     | 12.5                    | 48.9 |      |      | 45.2 |      |
| <b>Larsen 2014</b>            | V-D150 Exp        |                    |      |   |      | 2.7             |   |      | 4.4 |          |   |   |     | 15.5                  |     |   |     | 17.1                    | 26.1 |      |      | 22.8 |      |
| <b>Larsen 2014</b>            | V-D150 Naive      |                    |      |   |      | 1.3             |   |      | 5.9 |          |   |   |     | 11.8                  |     |   |     | 12.5                    | 11.5 |      |      | 45.2 |      |
| <b>Navgren 2014</b>           | No data           |                    |      |   |      |                 |   |      |     |          |   |   |     |                       |     |   |     |                         |      |      |      |      |      |
| <b>Ogawa 2014</b>             |                   |                    | 23.2 |   |      |                 |   | 2.6  |     |          |   |   |     |                       |     |   |     |                         |      |      | 54.7 |      |      |
| <b>Siu 2014</b>               |                   |                    |      |   |      |                 |   |      |     | 1.8      |   |   |     |                       |     |   |     |                         |      |      |      |      |      |
| <b>Tran 2014</b>              |                   | 39.0               |      |   |      |                 |   |      |     |          |   |   |     |                       |     |   |     |                         |      | 48.3 |      |      |      |
| <b>Yap 2014</b>               | D110              | 16.5               |      |   |      | 29.6            |   |      |     |          |   |   |     |                       |     |   |     |                         |      |      |      |      |      |
| <b>Abraham 2015</b>           | V-D               | 11.6               |      |   | 10.4 | 7.7             |   |      | 8.0 |          |   |   |     |                       |     |   |     |                         | 35.1 |      |      | 34.0 |      |



| Study                       | Subgroup/Comments                | Vascular disease % |      |      |      | Renal disease % |      |     |      | Cancer % |      |     |     | History of bleeding % |     |     |      | ASA/NSAIDs medication % |      |      |      |
|-----------------------------|----------------------------------|--------------------|------|------|------|-----------------|------|-----|------|----------|------|-----|-----|-----------------------|-----|-----|------|-------------------------|------|------|------|
|                             |                                  | D                  | R    | A    | VKA  | D               | R    | A   | VKA  | D        | R    | A   | VKA | D                     | R   | A   | VKA  | D                       | R    | A    | VKA  |
| <b>Avgil-Tsadok 2015</b>    | Only differentiated by gender    |                    |      |      |      |                 |      |     |      |          |      |     |     |                       |     |     |      |                         |      |      |      |
| <b>Bouillon 2015</b>        | Only differentiated by switching |                    |      |      |      |                 |      |     |      |          |      |     |     |                       |     |     |      |                         |      |      |      |
| <b>Chang 2015</b>           | V-D                              |                    |      |      |      | 4.2             | 2.1  |     | 5.1  |          |      |     |     |                       |     |     |      | 15.6                    | 43.7 |      | 23.9 |
| <b>Engelberger 2015</b>     | R Switch                         |                    | 32.6 |      |      |                 | 10.6 |     |      |          |      |     |     |                       | 2.7 |     |      |                         | 24.9 |      |      |
| <b>Engelberger 2015</b>     | R Naive                          |                    | 30.9 |      |      |                 | 6.8  |     |      |          |      |     |     |                       | 3.8 |     |      |                         | 45.4 |      |      |
| <b>Graham 2015</b>          | V-D                              | 18.0               |      |      | 18.0 | 18.0            |      |     | 18.0 |          |      |     |     | 4.0                   |     |     | 4.0  | 32.0                    |      | 32.0 |      |
| <b>Granziera 2015</b>       | V 80-84 y                        |                    |      |      | 24.8 |                 |      |     |      |          |      |     |     |                       |     |     |      |                         |      |      |      |
| <b>Granziera 2015</b>       | V ≥85 y                          |                    |      |      | 35.1 |                 |      |     |      |          |      |     |     |                       |     |     |      |                         |      |      |      |
| <b>Hernandez 2015</b>       | V-D                              | 51.1               |      |      | 50.7 | 32.9            |      |     | 31.3 |          |      |     |     | 11.1                  |     |     | 9.5  | 7.5                     |      | 8.0  |      |
| <b>Ho 2015</b>              | V-D                              | 29.0               |      |      | 32.9 |                 |      |     |      |          |      |     |     | 0.0                   |     |     | 2.6  |                         |      |      |      |
| <b>Jacobs Abstract 2015</b> | No data                          |                    |      |      |      |                 |      |     |      |          |      |     |     |                       |     |     |      |                         |      |      |      |
| <b>Kamble Abstract 2015</b> | No data                          |                    |      |      |      |                 |      |     |      |          |      |     |     |                       |     |     |      |                         |      |      |      |
| <b>Lauffenburger 2015</b>   | V-D                              | 35.0               |      |      | 32.9 | 11.2            |      |     | 10.4 |          |      |     |     | 13.0                  |     |     | 12.3 |                         |      |      |      |
| <b>Leef 2015</b>            | V-D/R/A                          | 12.6               | 12.6 | 12.6 | 15.0 | 2.5             | 2.5  | 2.5 | 2.7  | 9.5      | 9.5  | 9.5 | 7.6 | 2.7                   | 2.7 | 2.7 | 2.7  |                         |      |      |      |
| <b>Lin Abstract 2015</b>    | V-A                              |                    |      |      |      |                 |      |     |      |          |      |     |     | 7.4                   | 8.9 | 6.7 | 3.2  |                         |      |      |      |
| <b>Maura 2015</b>           | V-D                              | 29.0               |      |      | 29.0 |                 |      |     |      |          |      |     |     | 3.0                   |     |     | 3.0  | 19.0                    |      | 19.0 |      |
| <b>Maura 2015</b>           | V-R                              |                    | 27.0 |      | 27.0 |                 |      |     |      |          |      |     |     |                       | 2.0 |     | 2.0  | 19.0                    |      | 19.0 |      |
| <b>Sjögren 2015</b>         |                                  |                    |      |      |      |                 |      |     | 3.9  |          |      |     |     |                       |     |     |      |                         |      |      |      |
| <b>Tamayo 2015</b>          |                                  |                    | 36.7 |      |      |                 | 16.7 |     |      |          | 18.3 |     |     |                       |     |     |      | 7.9                     |      |      |      |

| Study                     | Subgroup/Comments | Vascular disease % |   |      |     | Renal disease % |   |      |     | Cancer % |   |      |     | History of bleeding % |   |      |     | ASA/NSAIDs medication % |      |      |      |
|---------------------------|-------------------|--------------------|---|------|-----|-----------------|---|------|-----|----------|---|------|-----|-----------------------|---|------|-----|-------------------------|------|------|------|
|                           |                   | D                  | R | A    | VKA | D               | R | A    | VKA | D        | R | A    | VKA | D                     | R | A    | VKA | D                       | R    | A    | VKA  |
| Verdecchia 2015           |                   | 22.0               |   |      |     |                 |   |      |     |          |   |      |     | 9.0                   |   |      |     | 28.0                    |      |      |      |
| Adeboyeje Abstract 2016   | No data           |                    |   |      |     |                 |   |      |     |          |   |      |     |                       |   |      |     |                         |      |      |      |
| Arihiro 2016              | V-D/R/A           |                    |   |      |     |                 |   |      |     |          |   |      |     |                       |   |      |     | 18.5                    | 18.5 | 18.5 | 17.8 |
| Avgil-Tsadok 2016         | V-D110 (<75 y)    | 48.6               |   | 49.1 |     | 22.0            |   | 23.6 |     | 11.0     |   | 8.7  |     | 10.1                  |   | 10.1 |     | 22.3                    |      | 21.1 |      |
| Avgil-Tsadok 2016         | V-D150 (<75 y)    | 37.7               |   | 49.1 |     | 10.3            |   | 23.6 |     | 7.7      |   | 8.7  |     | 5.4                   |   | 10.1 |     | 20.5                    |      | 21.1 |      |
| Avgil-Tsadok 2016         | V-D110 (≥75 y)    | 46.9               |   | 51.8 |     | 25.1            |   | 35.0 |     | 11.1     |   | 11.5 |     | 9.5                   |   | 11.5 |     | 17.5                    |      | 17.7 |      |
| Avgil-Tsadok 2016         | V-D150 (≥75 y)    | 43.5               |   | 51.8 |     | 15.1            |   | 35.0 |     | 10.8     |   | 11.5 |     | 8.7                   |   | 11.5 |     | 17.9                    |      | 17.7 |      |
| Blin 2016                 |                   |                    |   |      |     |                 |   |      |     |          |   |      |     |                       |   |      |     |                         |      |      |      |
| Camm (XANTUS) 2016        |                   | 28.7               |   |      |     | 9.4             |   |      |     |          |   |      |     |                       |   |      |     | 19.0                    |      |      |      |
| Chan EW 2016              |                   | 26.9               |   |      |     | 9.8             |   |      |     |          |   |      |     | 8.0                   |   |      |     | 5.8                     |      |      |      |
| Chan YH 2016a             | V-D               | 16.0               |   | 16.0 |     | 22.0            |   | 22.0 |     |          |   | 2.0  |     | 2.0                   |   | 25.0 |     | 26.0                    |      |      |      |
| Chan YH 2016a             | V-R               | 16.0               |   | 16.0 |     | 22.0            |   | 22.0 |     |          |   | 2.0  |     | 3.0                   |   | 23.0 |     | 23.0                    |      |      |      |
| Chan YH 2016b             | V-D               | 16.0               |   | 16.0 |     | 23.0            |   | 23.0 |     |          |   | 1.0  |     | 1.0                   |   | 25.0 |     | 26.0                    |      |      |      |
| Coleman (REVISIT-US) 2016 | V-A               | 19.1               |   | 19.0 |     | 1.8             |   | 1.8  |     |          |   |      |     |                       |   |      |     | 27.5                    |      | 27.5 |      |
| Coleman (REVISIT-US) 2016 | V-R               | 19.8               |   | 20.0 |     | 1.2             |   | 1.2  |     |          |   |      |     |                       |   |      |     | 27.3                    |      | 26.9 |      |
| Coleman (RELIEF) 2016     | V-R               | 10.6               |   | 8.9  |     | 10.6            |   | 12.8 |     |          |   |      |     |                       |   |      |     | 28.1                    |      | 24.8 |      |
| Ellis 2016                | V-D110            |                    |   |      |     |                 |   |      |     |          |   |      |     |                       |   |      |     | 35.0                    |      | 52.0 |      |
| Ellis 2016                | V-D150            |                    |   |      |     |                 |   |      |     |          |   |      |     |                       |   |      |     | 50.0                    |      | 52.0 |      |
| Ellis 2016                | V-R               |                    |   |      |     |                 |   |      |     |          |   |      |     |                       |   |      |     | 55.0                    |      | 52.0 |      |

| Study                | Subgroup/Comments    | Vascular disease % |      |      |      | Renal disease % |      |      |      | Cancer % |      |      |      | History of bleeding % |      |      |      | ASA/NSAIDs medication % |      |      |      |
|----------------------|----------------------|--------------------|------|------|------|-----------------|------|------|------|----------|------|------|------|-----------------------|------|------|------|-------------------------|------|------|------|
|                      |                      | D                  | R    | A    | VKA  | D               | R    | A    | VKA  | D        | R    | A    | VKA  | D                     | R    | A    | VKA  | D                       | R    | A    | VKA  |
| Gorst-Rasmussen 2016 | D110-R15             | 18.1               | 22.2 |      |      | 2.5             | 10.1 |      |      |          |      |      |      | 16.8                  | 17.0 |      |      | 82.1                    | 88.8 |      |      |
| Gorst-Rasmussen 2016 | D150-R20             | 9.9                | 12.2 |      |      | 1.1             | 1.5  |      |      |          |      |      |      | 10.1                  | 14.3 |      |      | 66.9                    | 75.4 |      |      |
| Gorst-Rasmussen 2016 | V-R15                |                    | 22.2 |      | 20.5 |                 | 10.1 |      | 6.5  |          |      |      |      |                       | 17.0 |      | 14.3 |                         | 88.8 |      | 80.1 |
| Gorst-Rasmussen 2016 | V-R20                |                    | 12.2 |      | 20.5 |                 | 1.5  |      | 6.5  |          |      |      |      |                       | 14.3 |      | 14.3 |                         | 75.4 |      | 80.1 |
| Graham 2016          | D-R                  | 15.0               | 15.0 |      |      | 12.0            | 12.0 |      |      |          |      |      |      | 1.0                   | 1.0  |      |      | 14.0                    | 14.0 |      |      |
| Hecker 2016          |                      |                    | 22.0 |      |      |                 | 12.5 |      |      |          |      |      |      |                       |      |      |      |                         | 17.8 |      |      |
| Korenstra 2016       | V-D                  | 14.9               |      |      | 16.5 | 0.0             |      |      | 1.9  |          |      |      |      | 7.1                   |      |      | 7.3  | 5.8                     |      |      | 6.1  |
| Kwon 2016            | V-D/R                | 18.2               | 18.2 |      | 20.0 |                 |      |      |      |          |      |      |      | 27.7                  | 27.7 |      | 7.6  |                         |      |      |      |
| Larsen 2016          | V-D                  | 19.7               | 24.8 | 29.8 | 28.5 | 1.1             | 1.8  | 2.4  | 6.6  | 11.8     | 16.1 | 16.1 | 16.5 | 9.9                   | 12.8 | 14.0 | 11.8 | 62.7                    | 60.4 | 60.2 | 64.3 |
| Lip 2016a            | V-D                  | 28.8               | 29.7 | 34.6 | 34.1 | 7.3             | 8.1  | 7.6  | 14.6 |          |      |      |      | 11.0                  | 12.8 | 11.5 | 16.1 |                         |      |      |      |
| Lip 2016b            | V-D                  | 32.0               |      |      | 32.1 | 10.2            |      |      | 10.6 |          |      |      |      | 15.7                  |      |      | 16.0 |                         |      |      |      |
| Lip 2016b            | V-R                  |                    | 28.0 |      | 26.8 |                 | 7.4  |      | 7.7  |          |      |      |      |                       | 11.9 |      | 11.6 |                         |      |      |      |
| Lip 2016b            | V-A                  |                    |      | 32.6 | 31.6 |                 |      | 9.0  | 9.4  |          |      |      |      |                       |      | 14.1 | 13.8 |                         |      |      |      |
| Nishtala 2016        | V-D                  | 22.4               |      |      | 21.9 | 7.6             |      |      | 7.2  | 3.5      |      |      | 3.6  |                       |      |      |      | 79.5                    |      |      | 78.6 |
| Noseworthy 2016      | D-A                  | 48.8               |      | 50.0 | 18.3 |                 | 18.8 |      |      |          |      |      |      | 30.2                  |      | 31.4 |      | 11.9                    |      | 12.2 |      |
| Noseworthy 2016      | D-R                  | 46.6               | 46.8 |      | 13.7 | 13.3            |      |      |      |          |      |      |      | 30.8                  | 30.2 |      |      | 11.1                    | 10.8 |      |      |
| Noseworthy 2016      | R-A                  |                    | 48.8 | 50.0 |      | 19.0            | 19.1 |      |      |          |      |      |      |                       | 31.0 | 31.5 |      |                         | 11.7 | 12.3 |      |
| Seeger 2016          | V-D                  | 33.1               |      |      | 32.7 | 10.3            |      |      | 9.8  | 10.1     |      |      | 10.3 |                       |      |      |      | 34.0                    |      |      | 34.5 |
| Tziomalos 2016       | V-D110 (post stroke) | 33.3               |      |      | 29.7 | 33.3            |      |      | 39.2 |          |      |      |      |                       |      |      |      |                         |      |      |      |
| Villines 2016        | V-D                  | 19.8               |      |      | 19.4 | 11.7            |      |      | 11.1 |          |      |      |      |                       |      |      |      |                         |      |      |      |
| Yao 2016             | V-A                  |                    |      | 28.3 | 28.4 |                 |      | 10.1 | 10.1 |          |      |      |      |                       |      | 31.4 | 31.8 |                         |      | 12.1 | 12.5 |

| Study                   | Subgroup/Comments | Vascular disease % |      |      |      | Renal disease % |      |      |      | Cancer % |   |   |      | History of bleeding % |      |      |      | ASA/NSAIDs medication % |      |      |      |
|-------------------------|-------------------|--------------------|------|------|------|-----------------|------|------|------|----------|---|---|------|-----------------------|------|------|------|-------------------------|------|------|------|
|                         |                   | D                  | R    | A    | VKA  | D               | R    | A    | VKA  | D        | R | A | VKA  | D                     | R    | A    | VKA  | D                       | R    | A    | VKA  |
| Yao 2016                | V-D               | 23.4               |      |      | 23.1 | 5.6             |      |      | 5.6  |          |   |   |      | 29.4                  |      |      |      | 30.1                    | 10.3 |      | 10.2 |
| Yao 2016                | V-R               |                    | 26.9 |      | 27.5 |                 | 7.4  |      | 7.3  |          |   |   |      |                       | 30.7 |      |      | 31.5                    |      | 11.6 | 11.6 |
| Yap 2016                | V-D               | 38.8               |      |      | 53.4 |                 |      |      |      |          |   |   |      |                       |      |      |      |                         |      |      |      |
| Yavuz 2016              | V-D110            | 27.5               |      |      | 21.8 |                 |      |      |      |          |   |   |      |                       |      |      |      |                         | 15.7 |      | 14.4 |
| Yavuz 2016              | V-D150            | 21.8               |      |      | 21.8 |                 |      |      |      |          |   |   |      |                       |      |      |      |                         | 21.8 |      | 14.4 |
| Yoshimura 2016          | No data           |                    |      |      |      |                 |      |      |      |          |   |   |      |                       |      |      |      |                         |      |      |      |
| Abraham 2017            | R-D               | 46.6               | 46.8 |      |      | 13.7            | 13.3 |      |      |          |   |   |      | 30.8                  | 30.2 |      |      |                         | 11.1 | 10.8 |      |
| Abraham 2017            | D-A               | 48.8               |      | 50.0 |      | 18.3            |      | 18.8 |      |          |   |   |      | 30.2                  |      | 31.4 |      |                         | 11.9 |      | 12.2 |
| Abraham 2017            | R-A               |                    | 48.8 | 50.0 |      |                 | 19.0 | 19.1 |      |          |   |   |      |                       | 31.0 | 31.5 |      |                         |      | 11.7 | 12.3 |
| Adeboyeje 2017          | V-D               |                    |      |      |      | 10.3            | 10.4 | 10.1 | 10.1 |          |   |   |      | 14.5                  | 14.2 | 14.3 | 14.9 | 9.5                     | 9.9  | 9.7  | 9.8  |
| Amin 2017               | V-D               | 53.3               |      |      | 55.1 | 19.1            |      |      | 19.9 |          |   |   |      | 19.5                  |      |      | 20.0 | 15.1                    |      |      | 15.6 |
| Amin 2017               | V-R               |                    | 56.0 |      | 56.1 |                 | 21.1 |      | 21.1 |          |   |   |      |                       | 22.5 |      |      | 22.7                    |      | 16.9 | 16.8 |
| Amin 2017               | V-A               |                    |      | 59.1 | 60.6 |                 |      | 23.9 | 25.5 |          |   |   |      |                       |      | 21.9 | 22.7 |                         |      | 19.7 | 20.2 |
| Bengtson 2017           | V-D               | 24.3               |      |      | 30.4 | 7.6             |      |      | 12.9 | 13.4     |   |   | 14.7 | 11.2                  |      |      |      | 13.3                    | 14.0 |      | 12.0 |
| Bengtson 2017           | V-D Switch        | 35.2               |      |      | 36.6 | 7.6             |      |      | 9.2  | 15.2     |   |   | 16.4 | 18.3                  |      |      |      | 19.8                    | 10.8 |      | 10.1 |
| Cha 2017                | V-D               | 45.0               | 44.3 | 43.0 | 51.3 |                 |      |      |      |          |   |   |      |                       |      |      |      |                         |      |      |      |
| Coleman (REASSESS) 2017 | V-A               |                    |      | 16.7 | 14.2 |                 |      | 6.1  | 5.8  |          |   |   |      |                       |      |      |      |                         |      | 22.0 | 21.9 |
| Coleman 2017            | V-A               |                    |      | 15.4 | 13.5 |                 |      | 10.7 | 7.1  |          |   |   |      |                       |      |      |      |                         |      | 30.1 | 26.9 |
| Coleman (REAFFIRM) 2017 | V-D               | 18.2               |      |      | 16.8 | 9.5             |      |      | 8.7  |          |   |   |      | 3.8                   |      |      | 2.8  | 31.7                    |      |      | 31.2 |

| Study                           | Subgroup/Comments | Vascular disease % |      |      |      | Renal disease % |      |      |      | Cancer % |      |      |      | History of bleeding % |      |      |      | ASA/NSAIDs medication % |      |      |      |
|---------------------------------|-------------------|--------------------|------|------|------|-----------------|------|------|------|----------|------|------|------|-----------------------|------|------|------|-------------------------|------|------|------|
|                                 |                   | D                  | R    | A    | VKA  | D               | R    | A    | VKA  | D        | R    | A    | VKA  | D                     | R    | A    | VKA  | D                       | R    | A    | VKA  |
| <b>Coleman (REAFFIRM) 2017</b>  | V-R               |                    | 21.5 |      | 20.7 |                 | 9.4  |      | 9.3  |          |      |      |      | 4.6                   |      |      | 4.9  |                         | 35.1 |      | 35.1 |
| <b>Coleman (REAFFIRM) 2017</b>  | V-A               |                    |      | 20.7 | 20.6 |                 |      | 11.5 | 12.0 |          |      |      |      |                       | 6.1  | 6.0  |      |                         | 35.4 | 36.0 |      |
| <b>Deitelzweig 2017</b>         | D-A               |                    |      |      |      |                 |      |      |      |          |      |      |      | 16.2                  |      | 16.4 |      |                         |      |      |      |
| <b>Deitelzweig 2017</b>         | R-A               |                    |      |      |      |                 |      |      |      |          |      |      |      | 16.6                  | 16.8 |      |      |                         |      |      |      |
| <b>Deitelzweig 2017</b>         | V-A               |                    |      |      |      |                 |      |      |      |          |      |      |      |                       |      | 18.8 | 19.0 |                         |      |      |      |
| <b>Denas 2017</b>               | V-D/R/A           | 11.4               | 11.4 | 11.4 | 11.5 | 2.6             | 2.6  | 2.6  | 2.7  | 9.4      | 9.4  | 9.4  | 9.5  | 3.1                   | 3.1  | 3.1  | 3.1  |                         |      |      |      |
| <b>Halvorsen 2017</b>           | V-D               | 21.4               | 25.5 | 27.6 | 35.9 | 0.7             | 2.0  | 2.5  | 5.0  | 7.4      | 9.2  | 8.6  | 10.0 | 11.2                  | 14.8 | 15.1 | 16.8 | 73.2                    | 79.7 | 76.7 | 69.6 |
| <b>Hohnloser 2017</b>           | V-A               |                    |      | 39.7 | 40.2 |                 |      | 21.4 | 21.0 |          |      | 19.2 | 18.8 |                       |      | 9.7  | 9.8  |                         | 59.2 | 59.3 |      |
| <b>Hohnloser 2017</b>           | V-D               | 36.7               |      |      | 37.3 | 13.3            |      |      | 13.1 | 17.9     |      |      | 18.2 | 7.5                   |      |      | 7.7  | 55.4                    |      | 56.8 |      |
| <b>Hohnloser 2017</b>           | V-R               |                    | 38.4 |      | 38.9 |                 | 17.0 |      | 17.3 |          | 18.5 |      | 18.7 |                       | 8.1  |      | 8.2  |                         | 59.1 | 56.1 |      |
| <b>Kohsaka 2017</b>             | V-A               |                    |      | 32.4 | 32.0 |                 |      | 7.3  | 8.3  |          |      |      |      |                       | 11.3 | 12.1 |      |                         | 49.6 | 50.9 |      |
| <b>Kohsaka 2017</b>             | V-D               | 29.5               |      |      | 28.8 | 2.5             |      |      | 2.7  |          |      |      |      | 9.8                   |      |      | 9.1  | 45.6                    |      | 45.2 |      |
| <b>Kohsaka 2017</b>             | V-R               |                    | 31.3 |      | 30.5 |                 | 4.4  |      | 4.0  |          |      |      |      |                       | 11.2 |      | 11.3 |                         | 49.0 | 48.7 |      |
| <b>Lamberts 2017</b>            | V-D               | 9.3                | 9.2  | 10.4 | 13.8 | 2.1             | 4.1  | 4.9  | 7.7  |          |      |      |      | 11.8                  | 12.1 | 14.6 | 13.5 | 63.4                    | 64.7 | 63.0 | 65.3 |
| <b>Leschke (XANTUS-DE) 2017</b> |                   |                    | 20.6 |      |      |                 |      |      |      |          |      |      |      |                       |      |      |      |                         |      |      |      |
| <b>Li W-H 2017</b>              | V-R               | 23.8               | 23.9 |      | 16.6 | 0.9             | 0.4  |      | 0.6  |          |      |      |      | 11.3                  | 1.0  |      | 1.3  |                         |      |      |      |
| <b>Li X 2017</b>                | V-A               |                    |      | 24.2 | 23.9 |                 |      | 19.8 | 19.9 |          |      |      |      |                       |      | 16.6 | 16.4 |                         | 39.3 | 38.9 |      |
| <b>Lin 2017</b>                 | D-A               | 26.5               |      | 25.9 |      | 7.3             |      | 7.9  |      |          |      |      |      | 8.5                   |      | 8.4  |      |                         |      |      |      |
| <b>Lin 2017</b>                 | R-A               |                    | 27.5 | 27.1 |      |                 | 6.8  | 7.1  |      |          |      |      |      |                       | 10.2 | 10.4 |      |                         |      |      |      |

| Study              | Subgroup/Comments | Vascular disease % |      |      |      | Renal disease % |      |      |      | Cancer % |      |      |      | History of bleeding % |      |      |      | ASA/NSAIDs medication % |      |      |      |
|--------------------|-------------------|--------------------|------|------|------|-----------------|------|------|------|----------|------|------|------|-----------------------|------|------|------|-------------------------|------|------|------|
|                    |                   | D                  | R    | A    | VKA  | D               | R    | A    | VKA  | D        | R    | A    | VKA  | D                     | R    | A    | VKA  | D                       | R    | A    | VKA  |
| Lin 2017           | V-A               |                    |      | 30.0 | 29.4 |                 |      | 11.1 | 11.4 |          |      |      |      |                       |      | 10.9 | 10.6 |                         |      |      |      |
| Naganuma 2017      | V-D               | 19.0               |      |      | 18.0 |                 |      |      |      |          |      |      |      |                       |      |      |      | 28.0                    |      |      | 27.0 |
| Nielsen 2017       | V-D110            | 17.7               | 18.2 | 22.0 | 19.0 | 3.9             | 9.1  | 9.5  | 8.3  | 18.3     | 20.0 | 22.2 | 16.7 | 14.3                  | 15.0 | 17.3 | 11.4 | 74.8                    | 66.2 | 66.7 | 71.2 |
| Norby 2017         | D-R               | 19.3               | 19.5 |      |      | 5.0             | 5.3  |      |      | 7.8      | 8.5  |      |      | 4.7                   | 5.1  |      |      |                         |      |      |      |
| Norby 2017         | V-R               |                    | 23.1 |      | 26.0 |                 | 7.6  |      | 10.3 |          | 10.9 |      | 11.3 |                       |      |      |      |                         |      |      |      |
| Norby 2017         | V-R Switch        |                    | 38.7 |      | 38.3 |                 | 14.1 |      | 15.5 |          | 17.1 |      | 16.5 |                       |      |      |      |                         |      |      |      |
| Noseworthy 2017    | V-D               | 25.0               | 26.5 | 31.4 | 37.9 |                 |      |      |      |          |      |      |      | 7.3                   | 7.2  | 8.3  | 9.8  |                         |      |      |      |
| Peacock 2017       |                   |                    | 26.2 |      |      |                 | 11.0 |      |      | 15.3     |      |      |      |                       | 0.2  |      |      |                         |      | 33.7 |      |
| Russo-Alvarez 2017 | V-R               |                    | 15.9 |      | 15.9 |                 |      |      |      |          |      |      |      |                       | 7.8  |      | 10.8 |                         | 66.1 |      | 64.2 |
| Staerk 2017        | V-D               | 22.2               | 22.7 | 24.4 | 30.1 | 1.9             | 3.7  | 4.6  | 7.6  | 12.2     | 14.2 | 15.0 | 14.3 | 10.6                  | 10.8 | 13.2 | 11.8 | 61.2                    | 62.4 | 60.9 | 67.2 |
| Weir 2017          | V-R               |                    |      |      |      |                 |      |      |      |          |      |      |      |                       |      |      |      |                         |      |      |      |
| Yamashita 2017     | V-D/R/A           | 25.0               | 25.0 | 25.0 | 34.0 | 33.0            | 33.0 | 33.0 | 39.0 |          |      |      |      | 3.3                   | 3.3  | 3.3  | 3.7  | 14.7                    | 14.7 | 14.7 | 24.2 |
| Yiginer 2017       | D-R               | 22.9               | 42.0 |      |      |                 |      |      |      |          |      |      |      |                       |      |      |      | 10.5                    | 11.3 |      |      |

D...dabigatran; R...rivaroxaban; A...apixaban; V, VKA...vitamin K antagonist; figure next to a letter indicates dose in mg of DOAC indicated by the letter
