# Supplementary material for: Safety and efficacy of direct acting oral anticoagulants and vitamin K antagonists in nonvalvular atrial fibrillation – a network meta-analysis of real-world data
Source: Atypon-hosted journal article supplement (doi:10.1024/0301-1526/a000746), 2018-10-30
Supplement: 0301-1526_a000746_esm04.pdf [file 0301-1526_a000746_esm04.pdf]

ESM 4. Supplementary Table 3. Comparison of direct and indirect effects (p-values) for all outcomes

| Outcome<br>Comparison | Stroke | Major<br>bleeding | Intracranial<br>bleeding | Gastrointestinal<br>bleeding | Myocardial<br>infarction | Deaths |
|-----------------------|--------|-------------------|--------------------------|------------------------------|--------------------------|--------|
| <b>D-V</b>            | 0.158  | 0.702             | 0.480                    | 0.286                        | 0.119                    | 0.652  |
| <b>R-V</b>            | 0.273  | 0.704             | 0.388                    | 0.347                        | 0.120                    | 0.326  |
| <b>A-V</b>            | 0.655  | 0.808             | 0.196                    | 0.693                        | -                        | 0.601  |
| <b>D-R</b>            | 0.943  | 0.235             | 0.206                    | 0.258                        | 0.246                    | 0.306  |
| <b>D-A</b>            | 0.477  | 0.342             | 0.639                    | 0.939                        | -                        | 0.720  |
| <b>R-A</b>            | 0.367  | 0.473             | 0.610                    | 0.696                        | -                        | 0.865  |

D...dabigatran; R...rivaroxaban; A...apixaban; V...vitamin K antagonist.
