# Supplementary material for: Safety and efficacy of direct acting oral anticoagulants and vitamin K antagonists in nonvalvular atrial fibrillation – a network meta-analysis of real-world data
Source: Atypon-hosted journal article supplement (doi:10.1024/0301-1526/a000746), 2018-10-30
Supplement: 0301-1526_a000746_esm05.pdf [file 0301-1526_a000746_esm05.pdf]

ESM 5. Supplementary Table 4. Heterogeneity assessment across studies for all outcomes. Heterogeneity statistic, I<sup>2</sup> and tau<sup>2</sup>.

| Comparison                                                  | Chi <sup>2</sup> | df | p-value | I <sup>2</sup> | tau <sup>2</sup> |
|-------------------------------------------------------------|------------------|----|---------|----------------|------------------|
| <b>Efficacy endpoint (stroke, stroke/SE, stroke/TIA/SE)</b> |                  |    |         |                |                  |
| D - V                                                       | 105.44           | 38 | <0.001  | 64.0%          | 0.021            |
| R - V                                                       | 56.08            | 22 | <0.001  | 60.8%          | 0.019            |
| A - V                                                       | 88.29            | 13 | <0.001  | 85.3%          | 0.064            |
| D - R                                                       | 18.79            | 19 | 0.470   | 0.0%           | 0.000            |
| D - A                                                       | 31.29            | 9  | <0.001  | 71.2%          | 0.042            |
| R - A                                                       | 30.98            | 10 | 0.001   | 67.7%          | 0.038            |
| <b>Major bleeding</b>                                       |                  |    |         |                |                  |
| D - V                                                       | 396.16           | 41 | <0.001  | 89.7%          | 0.074            |
| R - V                                                       | 119.37           | 21 | <0.001  | 82.4%          | 0.030            |
| A - V                                                       | 54.36            | 18 | <0.001  | 66.9%          | 0.017            |
| D - R                                                       | 16.32            | 21 | 0.752   | 0.0%           | 0.000            |
| D - A                                                       | 70.12            | 16 | <0.001  | 77.2%          | 0.060            |
| R - A                                                       | 81.47            | 16 | <0.001  | 80.4%          | 0.061            |
| <b>Intracranial bleeding</b>                                |                  |    |         |                |                  |
| D - V                                                       | 49.68            | 38 | 0.097   | 23.5%          | 0.016            |
| R - V                                                       | 24.43            | 17 | 0.108   | 30.4%          | 0.028            |
| A - V                                                       | 13.90            | 11 | 0.239   | 20.8%          | 0.021            |
| D - R                                                       | 35.41            | 16 | 0.003   | 54.8%          | 0.120            |
| D - A                                                       | 11.58            | 7  | 0.115   | 39.5%          | 0.086            |
| R - A                                                       | 5.08             | 8  | 0.749   | 0.0%           | 0.000            |
| <b>Gastrointestinal bleeding</b>                            |                  |    |         |                |                  |
| D - V                                                       | 123.74           | 27 | <0.001  | 78.2%          | 0.041            |
| R - V                                                       | 30.22            | 11 | 0.001   | 63.6%          | 0.024            |
| A - V                                                       | 9.53             | 4  | 0.049   | 58.0%          | 0.018            |
| D - R                                                       | 18.72            | 12 | 0.095   | 35.9%          | 0.011            |
| D - A                                                       | 40.53            | 3  | <0.001  | 92.6%          | 0.317            |
| R - A                                                       | 42.01            | 3  | <0.001  | 92.9%          | 0.363            |

**Myocardial infarction**

|              |       |    |        |       |       |
|--------------|-------|----|--------|-------|-------|
| <b>D - V</b> | 55.56 | 17 | <0.001 | 69.4% | 0.059 |
| <b>R - V</b> | 8.58  | 5  | 0.127  | 41.7% | 0.024 |
| <b>A - V</b> | 0.04  | 1  | 0.848  | 80.0% | 0.000 |
| <b>D - R</b> | 5.46  | 5  | 0.362  | 28.5% | 0.004 |

**Deaths**

|              |        |    |        |       |       |
|--------------|--------|----|--------|-------|-------|
| <b>D - V</b> | 231.93 | 15 | <0.001 | 93.5% | 0.128 |
| <b>R - V</b> | 76.59  | 5  | <0.001 | 93.5% | 0.105 |
| <b>A - V</b> | 89.33  | 2  | <0.001 | 97.8% | 0.377 |
| <b>D - R</b> | 13.10  | 7  | 0.070  | 46.5% | 0.013 |
| <b>D - A</b> | 9.25   | 2  | 0.010  | 78.4% | 0.084 |
| <b>R - A</b> | 15.38  | 2  | <0.001 | 87.0% | 0.089 |

---
