# Supplementary material for: Safety and efficacy of direct acting oral anticoagulants and vitamin K antagonists in nonvalvular atrial fibrillation – a network meta-analysis of real-world data
Source: Atypon-hosted journal article supplement (doi:10.1024/0301-1526/a000746), 2018-10-30
Supplement: 0301-1526_a000746_esm06.pdf [file 0301-1526_a000746_esm06.pdf]

ESM 6. Supplementary Table 5. Overview of risk of bias assessment

| Study                  | Selection bias | Allocation/ intervention bias | Misclassification/ detection bias | Confounding    | Attrition/ performance bias |
|------------------------|----------------|-------------------------------|-----------------------------------|----------------|-----------------------------|
| Amin 2013              | Low            | Low                           | Low                               | N/A            | Possible                    |
| Larsen 2013            | Low            | Low                           | Low                               | Low            | Low                         |
| Sörensen 2013          | Low            | Low                           | Low                               | Possible       | Low                         |
| Southworth 2013        | Low            | Low                           | Unclassifiable                    | Unclassifiable | Low                         |
| Bengtson Abstract 2014 | Low            | Unclassifiable                | Low                               | Unclassifiable | Low                         |
| Beyer-Westendorf 2014  | Low            | Low                           | Low                               | N/A            | Low                         |
| Fontaine 2014          | Low            | Low                           | Possible                          | N/A            | Possible                    |
| Laliberte 2014         | Low            | Low                           | Low                               | Low            | Low                         |
| Larsen 2014            | Low            | Low                           | Low                               | Low            | Low                         |
| Navgren 2014           | Possible       | Low                           | Low                               | N/A            | Low                         |
| Ogawa 2014             | Low            | Low                           | Possible                          | N/A            | Possible                    |
| Siu 2014               | Low            | Low                           | Low                               | N/A            | Unclassifiable              |
| Tran 2014              | Unclassifiable | Unclassifiable                | Unclassifiable                    | N/A            | Unclassifiable              |
| Yap 2014               | Possible       | Possible                      | Possible                          | N/A            | Possible                    |
| Abraham 2015           | Low            | Low                           | Possible                          | Low            | Low                         |
| Avgil-Tsadok 2015      | Low            | Low                           | Low                               | Low            | Low                         |
| Bouillon 2015          | Low            | Low                           | Low                               | Low            | Low                         |
| Chang 2015             | Low            | Low                           | Possible                          | Low            | Possible                    |
| Engelberger 2015       | Possible       | Low                           | Possible                          | N/A            | Possible                    |

| <b>Study</b>                   | <b>Selection bias</b> | <b>Allocation/ intervention bias</b> | <b>Misclassification/ detection bias</b> | <b>Confounding</b> | <b>Attrition/ performance bias</b> |
|--------------------------------|-----------------------|--------------------------------------|------------------------------------------|--------------------|------------------------------------|
| <b>Graham 2015</b>             | Low                   | Low                                  | Low                                      | Low                | Low                                |
| <b>Granziera 2015</b>          | Possible              | Low                                  | Low                                      | N/A                | Low                                |
| <b>Hernandez 2015</b>          | Low                   | Low                                  | Low                                      | Possible           | Low                                |
| <b>Ho 2015</b>                 | Possible              | Low                                  | Possible                                 | Possible           | Low                                |
| <b>Jacobs Abstract 2015</b>    | Low                   | Unclassifiable                       | Unclassifiable                           | Unclassifiable     | Unclassifiable                     |
| <b>Kamble Abstract 2015</b>    | Low                   | Low                                  | Low                                      | Possible           | Unclassifiable                     |
| <b>Lauffenburger 2015</b>      | Low                   | Possible                             | Possible                                 | Possible           | Low                                |
| <b>Leef 2015</b>               | Low                   | Low                                  | Possible                                 | Low                | Low                                |
| <b>Lin Abstract 2015</b>       | Low                   | Possible                             | Low                                      | Low                | Possible                           |
| <b>Maura 2015</b>              | Possible              | Low                                  | Possible                                 | Low                | Low                                |
| <b>Sjögren 2015</b>            | Low                   | Low                                  | Low                                      | N/A                | Low                                |
| <b>Tamayo 2015</b>             | Low                   | Low                                  | Possible                                 | N/A                | Low                                |
| <b>Verdecchia 2015</b>         | Low                   | Low                                  | Low                                      | N/A                | Low                                |
| <b>Adeboyeje Abstract 2016</b> | Unclassifiable        | Low                                  | Low                                      | Low                | Unclassifiable                     |
| <b>Arihiro 2016</b>            | Low                   | Low                                  | Low                                      | Possible           | Low                                |
| <b>Avgil-Tsadok 2016</b>       | Low                   | Possible                             | Low                                      | Possible           | Low                                |
| <b>Blin 2016</b>               | Low                   | Low                                  | Low                                      | N/A                | Low                                |
| <b>Camm (XANTUS) 2016</b>      | Possible              | Low                                  | Low                                      | N/A                | Low                                |
| <b>Chan EW 2016</b>            | Low                   | Low                                  | Low                                      | N/A                | Low                                |

| <b>Study</b>                     | <b>Selection bias</b> | <b>Allocation/ intervention bias</b> | <b>Misclassification/ detection bias</b> | <b>Confounding</b> | <b>Attrition/ performance bias</b> |
|----------------------------------|-----------------------|--------------------------------------|------------------------------------------|--------------------|------------------------------------|
| <b>Chan YH 2016a</b>             | Possible              | Low                                  | Low                                      | Possible           | Low                                |
| <b>Chan YH 2016b</b>             | Possible              | Low                                  | Low                                      | Possible           | Low                                |
| <b>Coleman (REVISIT-US) 2016</b> | Definite              | Low                                  | Low                                      | Possible           | Low                                |
| <b>Coleman (RELIEF) 2016</b>     | Possible              | Low                                  | Low                                      | Possible           | Low                                |
| <b>Ellis 2016</b>                | Possible              | Possible                             | Low                                      | Possible           | Low                                |
| <b>Gorst-Rasmussen 2016</b>      | Low                   | Low                                  | Low                                      | Possible           | Low                                |
| <b>Graham 2016</b>               | Possible              | Possible                             | Possible                                 | Possible           | Low                                |
| <b>Hecker 2016</b>               | Low                   | Possible                             | Low                                      | N/A                | Low                                |
| <b>Korenstra 2016</b>            | Low                   | Low                                  | Low                                      | Low                | Low                                |
| <b>Kwon 2016</b>                 | Low                   | Low                                  | Low                                      | Unclassifiable     | Low                                |
| <b>Larsen 2016</b>               | Low                   | Possible                             | Low                                      | Low                | Low                                |
| <b>Lip 2016a</b>                 | Low                   | Low                                  | Low                                      | Possible           | Low                                |
| <b>Lip 2016b</b>                 | Low                   | Low                                  | Possible                                 | Low                | Possible                           |
| <b>Nishtala 2016</b>             | Low                   | Low                                  | Low                                      | Low                | Low                                |
| <b>Noseworthy 2016</b>           | Low                   | Low                                  | Possible                                 | Low                | Low                                |
| <b>Seeger 2016</b>               | Low                   | Low                                  | Low                                      | Possible           | Low                                |
| <b>Tziomalos 2016</b>            | Low                   | Low                                  | Low                                      | Low                | Low                                |
| <b>Villines 2016</b>             | Low                   | Low                                  | Low                                      | Possible           | Low                                |
| <b>Yao 2016</b>                  | Low                   | Low                                  | Possible                                 | Possible           | Low                                |

| <b>Study</b>                    | <b>Selection bias</b> | <b>Allocation/ intervention bias</b> | <b>Misclassification/ detection bias</b> | <b>Confounding</b> | <b>Attrition/ performance bias</b> |
|---------------------------------|-----------------------|--------------------------------------|------------------------------------------|--------------------|------------------------------------|
| <b>Yap 2016</b>                 | Low                   | Low                                  | Possible                                 | Possible           | Low                                |
| <b>Yavuz 2016</b>               | Possible              | Low                                  | Possible                                 | Possible           | Low                                |
| <b>Yoshimura 2016</b>           | Low                   | Unclassifiable                       | Unclassifiable                           | Unclassifiable     | Unclassifiable                     |
| <b>Abraham 2017</b>             | Low                   | Low                                  | Possible                                 | Possible           | Low                                |
| <b>Adeboyeje 2017</b>           | Low                   | Low                                  | Possible                                 | Possible           | Possible                           |
| <b>Amin 2017</b>                | Low                   | Low                                  | Low                                      | Unclassifiable     | Low                                |
| <b>Bengtson 2017</b>            | Low                   | Low                                  | Low                                      | Low                | Possible                           |
| <b>Cha 2017</b>                 | Low                   | Low                                  | Low                                      | Definite           | Low                                |
| <b>Coleman (REASSESS) 2017</b>  | Low                   | Low                                  | Low                                      | Possible           | Low                                |
| <b>Coleman 2017</b>             | Low                   | Low                                  | Low                                      | Possible           | Low                                |
| <b>Coleman (REAFFIRM) 2017</b>  | Low                   | Low                                  | Low                                      | Possible           | Low                                |
| <b>Deitelzweig 2017</b>         | Low                   | Possible                             | Possible                                 | Low                | Possible                           |
| <b>Denas 2017</b>               | Low                   | Low                                  | Low                                      | Possible           | Low                                |
| <b>Halvorsen 2017</b>           | Low                   | Low                                  | Possible                                 | Possible           | Low                                |
| <b>Hohnloser 2017</b>           | Low                   | Low                                  | Low                                      | Possible           | Low                                |
| <b>Kohsaka 2017</b>             | Low                   | Low                                  | Low                                      | Possible           | Possible                           |
| <b>Lamberts 2017</b>            | Low                   | Low                                  | Possible                                 | Possible           | Possible                           |
| <b>Leschke (XANTUS-DE) 2017</b> | Possible              | Possible                             | Low                                      | N/A                | Low                                |
| <b>Li W-H 2017</b>              | Possible              | Possible                             | Low                                      | Possible           | Low                                |

| <b>Study</b>              | <b>Selection bias</b> | <b>Allocation/ intervention bias</b> | <b>Misclassification/ detection bias</b> | <b>Confounding</b> | <b>Attrition/ performance bias</b> |
|---------------------------|-----------------------|--------------------------------------|------------------------------------------|--------------------|------------------------------------|
| <b>Li X 2017</b>          | Low                   | Low                                  | Low                                      | Possible           | Low                                |
| <b>Lin 2017</b>           | Low                   | Possible                             | Possible                                 | Unclassifiable     | Unclassifiable                     |
| <b>Naganuma 2017</b>      | Low                   | Low                                  | Low                                      | Possible           | Low                                |
| <b>Nielsen 2017</b>       | Low                   | Low                                  | Low                                      | Low                | Low                                |
| <b>Norby 2017</b>         | Low                   | Low                                  | Low                                      | Possible           | Low                                |
| <b>Noseworthy 2017</b>    | Low                   | Low                                  | Low                                      | Possible           | Low                                |
| <b>Peacock 2017</b>       | Low                   | Low                                  | Low                                      | N/A                | Low                                |
| <b>Russo-Alvarez 2017</b> | Possible              | Low                                  | Possible                                 | Possible           | Low                                |
| <b>Staerk 2017</b>        | Low                   | Low                                  | Possible                                 | Possible           | Possible                           |
| <b>Weir 2017</b>          | Low                   | Unclassifiable                       | Unclassifiable                           | Unclassifiable     | Unclassifiable                     |
| <b>Yamashita 2017</b>     | Possible              | Possible                             | Low                                      | Possible           | Low                                |
| <b>Yiginer 2017</b>       | Low                   | Possible                             | Possible                                 | Low                | Possible                           |
