# Supplementary material for: Safety and efficacy of direct acting oral anticoagulants and vitamin K antagonists in nonvalvular atrial fibrillation – a network meta-analysis of real-world data
Source: Atypon-hosted journal article supplement (doi:10.1024/0301-1526/a000746), 2018-10-30
Supplement: 0301-1526_a000746_esm07.pdf [file 0301-1526_a000746_esm07.pdf]

ESM 7. Supplementary Table 6. Sensitivity analysis of impact of risk of bias on overall hazard ratios (95% confidence intervals) DOACs against VKAs for efficacy and safety outcomes (0 low to 3 high risk of bias)

| Risk if bias | Main efficacy    | Major bleeding   | IC bleeding      | GI bleeding      | Myocardial infarction | Death            |
|--------------|------------------|------------------|------------------|------------------|-----------------------|------------------|
| 0            | 0.84 (0.73-0.96) | 0.87 (0.76-1.00) | 0.37 (0.25-0.54) | 1.06 (0.85-1.31) | 0.76 (0.53-1.11)      | 0.95 (0.74-1.23) |
| 1            | 0.82 (0.77-0.88) | 0.80 (0.71-0.89) | 0.61 (0.50-0.74) | 1.05 (0.89-1.24) | 0.87 (0.74-1.02)      | 0.88 (0.73-1.06) |
| 2            | 0.78 (0.68-0.91) | 0.75 (0.68-0.82) | 0.51 (0.43-0.59) | 0.96 (0.80-1.16) | 0.73 (0.52-1.02)      | 0.58 (0.40-0.83) |
| 3            | 0.86 (0.78-0.95) | 0.81 (0.65-1.01) | 0.57 (0.47-0.70) | 1.08 (0.94-1.25) | 0.88 (0.79-0.97)      | 0.55 (0.33-0.91) |

IC...intracranial, GI...gastrointestinal.
