# Supplementary material for: Safety and efficacy of direct acting oral anticoagulants and vitamin K antagonists in nonvalvular atrial fibrillation – a network meta-analysis of real-world data
Source: Atypon-hosted journal article supplement (doi:10.1024/0301-1526/a000746), 2018-10-30
Supplement: 0301-1526_a000746_esm19.pdf [file 0301-1526_a000746_esm19.pdf]

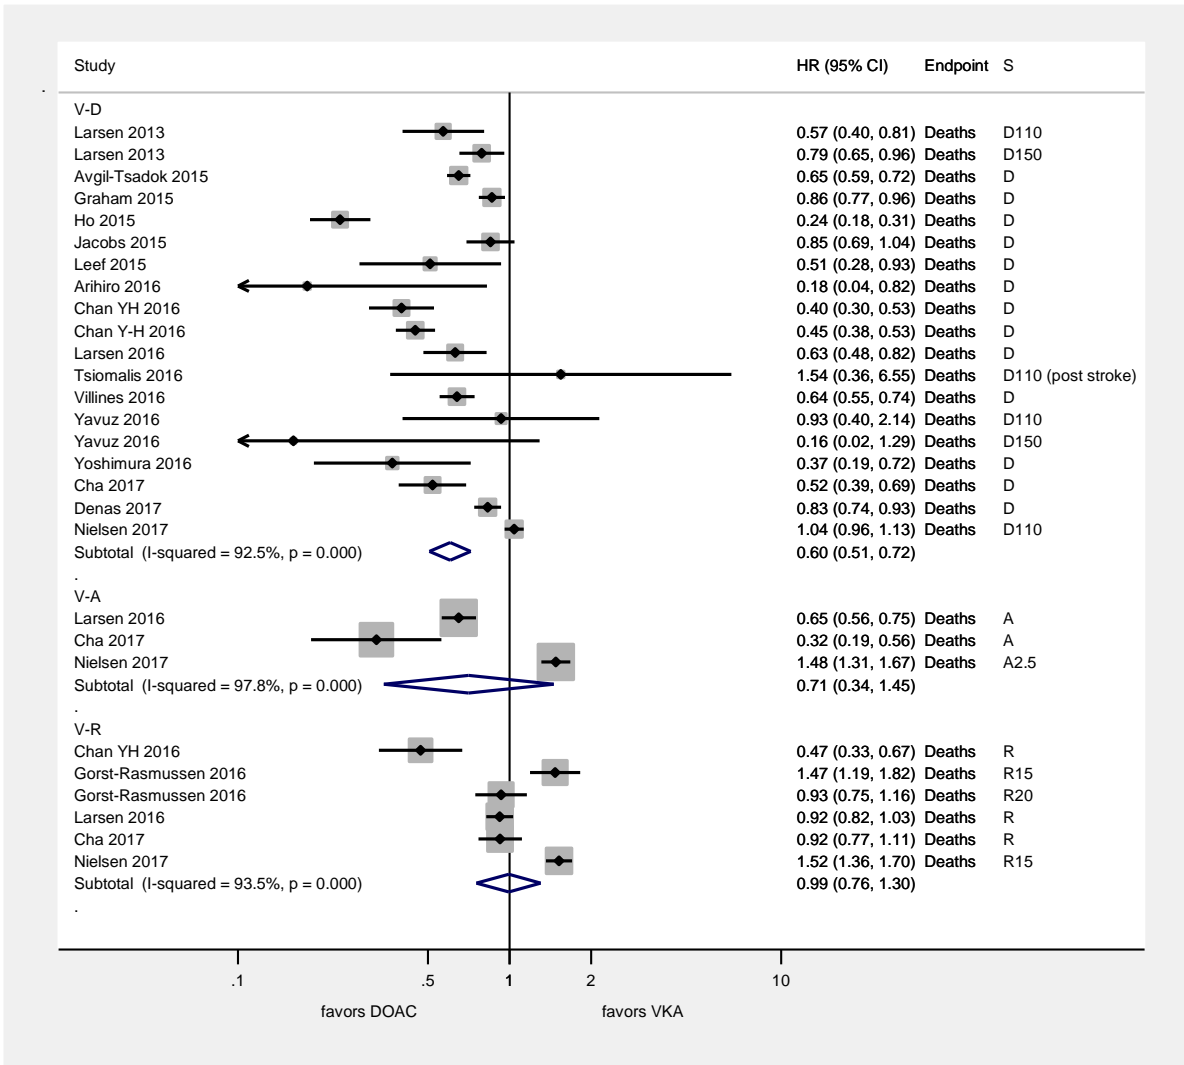

ESM 19. Supplementary Fig. 6. Forest plot of hazard ratios of DOACs versus VKAs for deaths. If a specific subgroup was analyzed this is indicated after the indicator 'D', 'R' or 'A' in the right column, a number after these indicators refers to the dose in mg once (R) or twice per day (D, A). The meta-analytical DerSimonian-Laird random effect estimates are indicated as diamonds in the subtotal line. Overall heterogeneity tests with I-squared and p-values are shown in these lines as well.
