# Supplementary material for: Safety and efficacy of direct acting oral anticoagulants and vitamin K antagonists in nonvalvular atrial fibrillation – a network meta-analysis of real-world data
Source: Atypon-hosted journal article supplement (doi:10.1024/0301-1526/a000746), 2018-10-30
Supplement: 0301-1526_a000746_esm21.pdf [file 0301-1526_a000746_esm21.pdf]

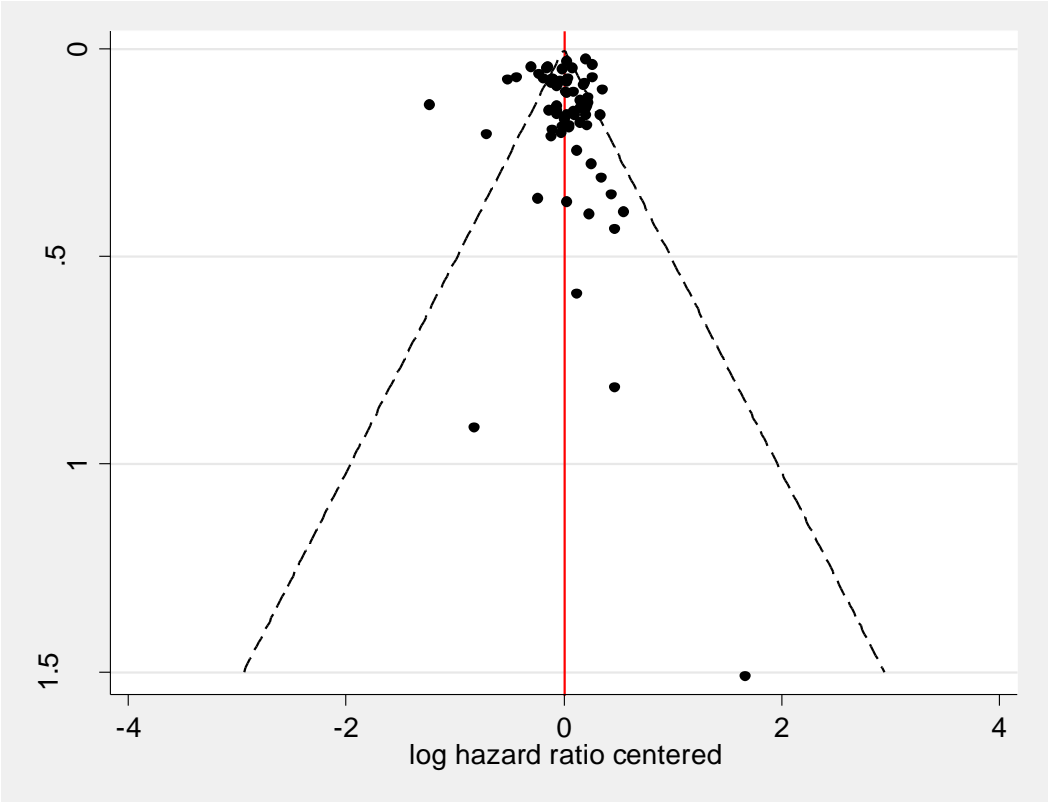

ESM 21. Supplementary Fig.8. Network funnel plot for hazard ratios of DOACs against VKAs for major bleeding.
