# Supplementary material for: Safety and efficacy of direct acting oral anticoagulants and vitamin K antagonists in nonvalvular atrial fibrillation – a network meta-analysis of real-world data
Source: Atypon-hosted journal article supplement (doi:10.1024/0301-1526/a000746), 2018-10-30
Supplement: 0301-1526_a000746_esm23.pdf [file 0301-1526_a000746_esm23.pdf]

## ESM 23.

### References

- Ruff CT, Giugliano RP, Braunwald E, Hoffman EB, Deenadayalu N, Ezekowitz MD, et al. Comparison of the efficacy and safety of new oral anticoagulants with warfarin in patients with atrial fibrillation: a meta-analysis of randomised trials. *Lancet*. 2014;383(9921):955–62.
- Hirschl M, Kundi M. New oral anticoagulants in the treatment of acute venous thromboembolism – a systematic review with indirect comparisons. *Vasa*. 2014;43(5):353–64.
- Proietti M, Laroche C, Opolski G, Maggioni AP, Boriani G, Lip GYH. 'Real-world' atrial fibrillation management in Europe: Observations from the 2-year follow-up of the EURObservational Research Programme-Atrial Fibrillation General Registry Pilot Phase. *Europace*. 2017;19(5):722–33.
- Almutairi AR, Zhou L, Gellad WF, Lee JK, Slack MK, Martin JR, et al. Effectiveness and Safety of Non-vitamin K Antagonist Oral Anticoagulants for Atrial Fibrillation and Venous Thromboembolism: A Systematic Review and Meta-analyses. *Clin Ther*. 2017;39(7):1456–78.e36.
- Bai Y, Shi XB, Ma CS, Lip GYH. Meta-Analysis of Effectiveness and Safety of Oral Anticoagulants in Atrial Fibrillation With Focus on Apixaban. *Am J Cardiol*. 2017;120(9):1689–95.
- Beyer-Westendorf J, Camm AJ, Coleman CI, Tamayo S. Rivaroxaban real-world evidence: Validating safety and effectiveness in clinical practice. *Thromb Haemost*. 2016;116(Suppl. 2):S13–s23.
- Deitelzweig S, Farmer C, Luo X, Vo L, Li X, Hamilton M, et al. Risk of major bleeding in patients with non-valvular atrial fibrillation treated with oral anticoagulants: a systematic review of real-world observational studies. *Curr Med Res Opin*. 2017;33(9):1583–94.
- Gong X, Tang S, Li J, Zhang X, Tian X, Ma S. Antithrombotic therapy strategies for atrial fibrillation patients undergoing percutaneous coronary intervention: A systematic review and network meta-analysis. *PLoS One*. 2017;12(10):e0186449.
- Lip GY, Lane DA. Stroke prevention in atrial fibrillation: a systematic review. *JAMA*. 2015;313(19):1950–62.
- Lip GY, Mitchell SA, Liu X, Liu LZ, Phatak H, Kachroo S, et al. Relative efficacy and safety of non-Vitamin K oral anticoagulants for non-valvular atrial fibrillation: Network meta-analysis comparing apixaban, dabigatran, rivaroxaban and edoxaban in three patient subgroups. *Int J Cardiol*. 2016;204:88–94.
- Lopez-Lopez JA, Sterne JAC, Thom HHZ, Higgins JPT, Hingorani AD, Okoli GN, et al. Oral anticoagulants for prevention of stroke in atrial fibrillation: systematic review, network meta-analysis, and cost effectiveness analysis. *BMJ*. 2017;359:j5058.
- Ntaios G, Papavasileiou V, Makaritsis K, Vemmos K, Michel P, Lip GYH. Real-World Setting Comparison of Nonvitamin-K Antagonist Oral Anticoagulants Versus Vitamin-K Antagonists for Stroke Prevention in Atrial Fibrillation: A Systematic Review and Meta-Analysis. *Stroke*. 2017;48(9):2494–503.
- Pan KL, Singer DE, Ovbiagele B, Wu YL, Ahmed MA, Lee M. Effects of Non-Vitamin K Antagonist Oral Anticoagulants Versus Warfarin in Patients With Atrial Fibrillation and Valvular Heart Disease: A Systematic Review and Meta-Analysis. *J Am Heart Assoc*. 2017;6(7).
- Patel P, Pandya J, Goldberg M. NOACs vs. Warfarin for Stroke Prevention in Nonvalvular Atrial Fibrillation. *Cureus*. 2017; 9(6):e1395.
- Sun MT, Wood MK, Chan W, Selva D, Sanders P, Casson RJ, et al. Risk of Intraocular Bleeding With Novel Oral Anticoagulants Compared With Warfarin: A Systematic Review and Meta-analysis. *JAMA Ophthalmol*. 2017;135(8):864–70.
- Tervonen T, Ustyugova A, Sri Bhashyam S, Lip GYH, Verdecchia P, Kwan R, et al. Comparison of Oral Anticoagulants for Stroke Prevention in Nonvalvular Atrial Fibrillation: A Multicriteria Decision Analysis. *Value Health*. 2017;20(10):1394–402.
- Weeda ER, White CM, Peacock WF, Coleman CI. Rates of major bleeding with rivaroxaban in real-world studies of nonvalvular atrial fibrillation patients: a meta-analysis. *Curr Med Res Opin*. 2016;32(6):1117–20.
- Wehling M, Collins R, Gil VM, Hanon O, Hardt R, Hoffmeister M, et al. Appropriateness of Oral Anticoagulants for the Long-Term Treatment of Atrial Fibrillation in Older People: Results of an Evidence-Based Review and International Consensus Validation Process (OAC-FORTA 2016). *Drugs Aging*. 2017;34(7):499–507.
- Hutton B, Salanti G, Caldwell DM, et al. The prisma extension statement for reporting of systematic reviews incorporating network meta-analyses of health care interventions: Checklist and explanations. *Ann Intern Med*. 2015;162(11):777–84.
- Parmar MK, Torri V, Stewart L. Extracting summary statistics to perform meta-analyses of the published literature for survival endpoints. *Stat Med*. 1998;17(24):2815–34.
- Guyatt GH, Oxman AD, Vist G, Kunz R, Brozek J, Alonso-Coello P, et al. GRADE guidelines: 4. Rating the quality of evidence. 2014;study limitations (risk of bias). *J Clin Epidemiol*. 64(4):407–15.
- Amin A, Stokes M, Wu N, Gatt E, Makenbaeva D, Wiederkehr D, et al. Application of randomized clinical trial data to actual practice: Apixaban therapy for reduction of stroke risk in non-valvular atrial fibrillation patients. *Curr Med Res Opin*. 2013; 29(10):1253–61.
- Larsen TB, Rasmussen LH, Skjøth F, Due KM, Callréus T, Rosenzweig M, et al. Efficacy and safety of dabigatran etexilate and warfarin in "real-world" patients with atrial fibrillation: A prospective nationwide cohort study. *J Am Coll Cardiol*. 2013;61(22):2264–73.
- Sorensen R, Gislason G, Torp-Pedersen C, Olesen JB, Fosbol EL, Hvidtfeldt MW, et al. Dabigatran use in Danish atrial fibrillation patients in 2011: a nationwide study. *BMJ Open*. 2013;3(5).
- Southworth MR, Reichman ME, Unger EF. Dabigatran and postmarketing reports of bleeding. *N Engl J Med*. 2013;368(14):1272–4.
- Bengtson L, Chen L, MacLehose R, Lutsey P, Alonso A, editors. Comparative Effectiveness of Dabigatran and Rivaroxaban versus Warfarin in Patients With Non-Valvular Atrial Fibrillation. Annual Conference of the American Heart Association; 2014: *Circulation*. 140(Suppl 2):A20218.
- Beyer-Westendorf J, Förster K, Pannach S, Ebertz F, Gelbricht V, Thieme C, et al. Rates, management, and outcome of rivaroxaban bleeding in daily care: Results from the Dresden NOAC registry. *Blood*. 2014;124(6):955–62.
- Fontaine GV, Mathews KD, Woller SC, Stevens SM, Lloyd JF, Evans RS. Major bleeding with dabigatran and rivaroxaban in patients with atrial fibrillation: A real-world setting. *Clin Appl Thromb Hemost*. 2014;20(7):665–72.
- Laliberté F, Cloutier M, Nelson WW, Coleman CI, Pilon D, Olson WH, et al. Real-world comparative effectiveness and safety of rivaroxaban and warfarin in nonvalvular atrial fibrillation patients. *Curr Med Res Opin*. 2014;30(7):1317–25.
- Larsen TB, Rasmussen LH, Gorst-Rasmussen A, Skjøth F, Rosenzweig M, Lane DA, et al. Myocardial ischemic events in 'Real world' patients with atrial fibrillation treated with dabigatran or warfarin. *Am J Med*. 2014;127(4):329–36.e4.
- Navgren M, Forsblad J, Wieloch M. Bleeding complications related to warfarin treatment: A descriptive register study from the anticoagulation clinic at Helsingborg Hospital. *J Thromb Thrombolysis*. 2014;38(1):98–104.
- Ogawa S, Ikeda T, Kitazono T, Nakagawara J, Minematsu K, Miyamoto S, et al. Present profiles of novel anticoagulant use in Japanese patients with atrial fibrillation: Insights from the rivaroxaban postmarketing surveillance registry. *J Stroke Cerebrovasc Dis*. 2014;23(10):2520–6.
- Siu CW, Lip GYH, Lam KF, Tse HF. Risk of stroke and intracranial hemorrhage in 9727 Chinese with atrial fibrillation in Hong Kong. *Heart Rhythm*. 2014;11(8):1401–8.

34. Tran TH, Nguyen C, Lam T, Campbell P. Bleeding incidence and real-life prescribing practices with dabigatran use in an acute care setting. *Consult Pharm*. 2014;29(11):735–40.
35. Yap LB, Rusani BI, Umadevan D, Muhammad Z, Hussin A, Kaur S, et al. A single centre experience of the efficacy and safety of dabigatran etexilate used for stroke prevention in atrial fibrillation. *J Thromb Thrombolysis*. 2014;38(1):39–44.
36. Abraham NS, Singh S, Alexander GC, Heien H, Haas LR, Crown W, et al. Comparative risk of gastrointestinal bleeding with dabigatran, rivaroxaban, and warfarin: population based cohort study. *BMJ*. 2015;350:h1857.
37. Avgil Tsadok M, Jackevicius CA, Rahme E, Humphries KH, Pilote L. Sex Differences in Dabigatran Use, Safety, and Effectiveness in a Population-Based Cohort of Patients with Atrial Fibrillation. *Circ Cardiovasc Qual Outcomes*. 2015;8(6):593–9.
38. Bouillon K, Bertrand M, Maura G, Blotiere PO, Ricordeau P, Zureik M. Risk of bleeding and arterial thromboembolism in patients with non-valvular atrial fibrillation either maintained on a vitamin K antagonist or switched to a non-vitamin K-antagonist oral anticoagulant: a retrospective, matched-cohort study. *Lancet Haematol*. 2015;2(4):e150–9.
39. Chang HY, Zhou M, Tang W, Alexander GC, Singh S. Risk of gastrointestinal bleeding associated with oral anticoagulants: Population based retrospective cohort study. *BMJ (Online)*. 2015;350.
40. Engelberger RP, Noll G, Schmidt D, Alatri A, Frei B, Kaiser WE, et al. Initiation of rivaroxaban in patients with nonvalvular atrial fibrillation at the primary care level: the Swiss Therapy in Atrial Fibrillation for the Regulation of Coagulation (STAR) Study. *Eur J Intern Med*. 2015;26(7):508–14.
41. Graham DJ, Reichman ME, Wernecke M, Zhang R, Southworth MR, Levenson M, et al. Cardiovascular, bleeding, and mortality risks in elderly medicare patients treated with dabigatran or warfarin for nonvalvular atrial fibrillation. *Circulation*. 2015;131(2):157–64.
42. Granziera S, Bertozzo G, Pengo V, Marigo L, Denas G, Petruzzellis F, et al. To treat or not to treat very elderly naive patients with atrial fibrillation with vitamin K antagonists (VKA): results from the VENPAF cohort. *Intern Emerg Med*. 2015;10(7):795–804.
43. Hernandez I, Baik SH, Piñera A, Zhang Y. Risk of bleeding with dabigatran in atrial fibrillation. *JAMA Internal Medicine*. 2015;175(1):18–24.
44. Ho CW, Ho MH, Chan PH, Hai JJ, Cheung E, Yeung CY, et al. Ischemic stroke and intracranial hemorrhage with aspirin, dabigatran, and warfarin: impact of quality of anticoagulation control. *Stroke*. 2015;46(1):23–30.
45. Jacobs V, May HT, Bair TL, Anderson JL, Crandall BG, Cutler M, et al. Abstract 11938: Long-term Population-based Outcomes of Novel Oral Anticoagulants Compared to Warfarin Among Long-term Anticoagulated Patients: A Propensity Matched Analysis. *Circulation*. 2015;132(Suppl 3):A11938.
46. Kamble S, Pan X, Phatak H, Kawabata H, Masseria C, Mardekian J, et al. Abstract 18465: Real World Comparison of Major Bleeding Risk Among Non-valvular Atrial Fibrillation Patients Newly Initiated on Warfarin versus Apixaban 5mg BID, Dabigatran 150 mg BID, or Rivaroxaban 20 mg QD. *Circulation*. 2015;132(Suppl 3):A18465.
47. Lauffenburger JC, Farley JF, Gehi AK, Rhoney DH, Brookhart MA, Fang G. Effectiveness and safety of dabigatran and warfarin in real-world US patients with non-valvular atrial fibrillation: A retrospective cohort study. *J Am Heart Assoc*. 2015;4(4):1–12.
48. Leef G, Qin D, Althouse A, Alam MB, Rattan R, Munir MB, et al. Risk of Stroke and Death in Atrial Fibrillation by Type of Anticoagulation: A Propensity-Matched Analysis. *Pacing Clin Electrophysiol*. 2015;38(11):1310–6.
49. Lin I, Masseria C, Mardekian J, Freaun M, Phatak H, Kamble S, et al. Real-world bleeding risk among non-valvular atrial fibrillation (NVAf) patients prescribed apixaban, dabigatran, rivaroxaban and warfarin: analysis of electronic health records. Poster presented at the 2015 European Society of Cardiology Congress 365, 29 August–2 September, London, UK (Poster P6215); London, UK2015.
50. Maura G, Blotiere PO, Billionnet KBC, Ricordeau P, Alla F, Zureik M. Comparison of the Short-Term risk of bleeding and arterial thromboembolic events in nonvalvular atrial fibrillation patients newly treated with dabigatran or rivaroxaban versus Vitamin K antagonists A French nationwide propensity-matched cohort study. *Circulation*. 2015;132(13):1252–60.
51. Sjogren V, Grzymala-Lubanski B, Renlund H, Friberg L, Lip GY, Svensson PJ, et al. Safety and efficacy of well managed warfarin. A report from the Swedish quality register Auricula. *Thromb Haemost*. 2015;113(6):1370–7.
52. Tamayo S, Peacock WF, Patel M, Sicignano N, Hopf KP, Fields LE, et al. Characterizing major bleeding in patients with nonvalvular atrial fibrillation: A pharmacovigilance study of 27 467 patients taking Rivaroxaban. *Clin Cardiol*. 2015;38(2):63–8.
53. Verdecchia P, Molini G, Bartolini C, De Filippo V, Valecchi F, Martone S, et al. Safety of dabigatran in an elderly population: Single center experience in Italy. *Current Drug Safety*. 2015;10(2):165–9.
54. Adeboyeje G, Sylwestrzak G, White J, Rosenberg A, Abarca J, Crawford G, et al. Abstract 2: Comparative Effectiveness and Safety of Anticoagulant Therapy With Warfarin, Dabigatran, Apixaban, or Rivaroxaban in Patients With Nonvalvular Atrial Fibrillation. *Circ Cardiovasc Qual Outcomes*. 2016;9(Suppl 2):A2.
55. Arihiro S, Todo K, Koga M, Furui E, Kinoshita N, Kimura K, et al. Three-month risk-benefit profile of anticoagulation after stroke with atrial fibrillation: The SAMURAI-Nonvalvular Atrial Fibrillation (NVAf) study. *Int J Stroke*. 2016;11(5):565–74.
56. Avgil-Tsadok M, Jackevicius CA, Essebag V, Eisenberg MJ, Rahme E, Behloul H, et al. Dabigatran use in elderly patients with atrial fibrillation. *Thromb Haemost*. 2016;115(1):152–60.
57. Blin P, Dureau-Pournin C, Lassalle R, Abouelfath A, Droz-Perroteau C, Moore N. A population database study of outcomes associated with Vitamin K antagonists in atrial fibrillation before DOAC. *Br J Clin Pharmacol*. 2016;81(3):569–78.
58. Camm AJ, Amarenco P, Haas S, Hess S, Kirchhof P, Kuhls S, et al. XANTUS: A real-world, prospective, observational study of patients treated with rivaroxaban for stroke prevention in atrial fibrillation. *Eur Heart J*. 2016;37(14):1145–53.
59. Chan EW, Lau WCY, Siu CW, Lip GYH, Leung WK, Anand S, et al. Effect of suboptimal anticoagulation treatment with antiplatelet therapy and warfarin on clinical outcomes in patients with nonvalvular atrial fibrillation: A population-wide cohort study. *Heart Rhythm*. 2016;13(8):1581–8.
60. Chan YH, Kuo CT, Yeh YH, Chang SH, Wu LS, Lee HF, et al. Thromboembolic, Bleeding, and Mortality Risks of Rivaroxaban and Dabigatran in Asians With Nonvalvular Atrial Fibrillation. *J Am Coll Cardiol*. 2016;68(13):1389–401.
61. Chan YH, Yen KC, See LC, Chang SH, Wu LS, Lee HF, et al. Cardiovascular, Bleeding, and Mortality Risks of Dabigatran in Asians with Nonvalvular Atrial Fibrillation. *Stroke*. 2016;47(2):441–9.
62. Coleman CI, Antz M, Bowrin K, Evers T, Simard EP, Bonne-meier H, et al. Real-world evidence of stroke prevention in patients with nonvalvular atrial fibrillation in the United States: the REVISIT-US study. *Curr Med Res Opin*. 2016;32(12):2047–53.
63. Coleman CI, Antz M, Ehlken B, Evers T. REal-Life Evidence of stroke prevention in patients with atrial Fibrillation – The RELIEF study. *Int J Cardiol*. 2016;203:882–4.
64. Ellis MH, Neuman T, Bitterman H, Dotan SG, Hammerman A, Battat E, et al. Bleeding in patients with atrial fibrillation treated with dabigatran, rivaroxaban or warfarin: A retrospective population-based cohort study. *Eur J Intern Med*. 2016;33:55–9.
65. Gorst-Rasmussen A, Lip GY, Bjerregaard Larsen T. Rivaroxaban versus warfarin and dabigatran in atrial fibrillation: comparative effectiveness and safety in Danish routine care. *Pharmacoepidemiol Drug Saf*. 2016;25(11):1236–44.

66. Graham DJ, Reichman ME, Wernecke M, Hsueh YH, Izem R, Southworth MR, et al. Stroke, Bleeding, and Mortality Risks in Elderly Medicare Beneficiaries Treated With Dabigatran or Rivaroxaban for Nonvalvular Atrial Fibrillation. *JAMA Intern Med.* 2016;176(11):1662–71.
67. Hecker J, Marten S, Keller L, Helmert S, Michalski F, Werth S, et al. Effectiveness and safety of rivaroxaban therapy in daily-care patients with atrial fibrillation. Results from the Dresden NOAC Registry. *Thromb Haemost.* 2016;115(5):939–49.
68. Korenstra J, Wijtvlief EP, Veeger NJ, Geluk CA, Bartels GL, Posma JL, et al. Effectiveness and safety of dabigatran versus acenocoumarol in 'real-world' patients with atrial fibrillation. *Europace.* 2016;18(9):1319–27.
69. Kwon CH, Kim M, Kim J, Nam GB, Choi KJ, Kim YH. Real-world comparison of non-vitamin K antagonist oral anticoagulants and warfarin in Asian octogenarian patients with atrial fibrillation. *Journal of Geriatric Cardiology.* 2016;13(7):566–72.
70. Larsen TB, Skjoth F, Nielsen PB, Kjaeldgaard JN, Lip GY. Comparative effectiveness and safety of non-vitamin K antagonist oral anticoagulants and warfarin in patients with atrial fibrillation: propensity weighted nationwide cohort study. *BMJ.* 2016;353:i3189.
71. Lip GY, Keshishian A, Kamble S, Pan X, Mardekian J, Horblyuk R, et al. Real-world comparison of major bleeding risk among non-valvular atrial fibrillation patients initiated on apixaban, dabigatran, rivaroxaban, or warfarin. A propensity score matched analysis. *Thromb Haemost.* 2016;116(5):975–86.
72. Lip GYH. How to REVISIT the increasing "real world" evidence for stroke prevention in non-valvular atrial fibrillation? *Curr Med Res Opin.* 2016;32(12):2055–7.
73. Nishtala PS, Gnjidic D, Jamieson HA, Hanger HC, Kaluarachchi C, Hilmer SN. 'Real-world' haemorrhagic rates for warfarin and dabigatran using population-level data in New Zealand. *Int J Cardiol.* 2016;203:746–52.
74. Noseworthy PA, Yao X, Abraham NS, Sangaralingham LR, McBane RD, Shah ND. Direct Comparison of Dabigatran, Rivaroxaban, and Apixaban for Effectiveness and Safety in Nonvalvular Atrial Fibrillation. *Chest.* 2016;150(6):1302–12.
75. Seeger JD, Bykov K, Bartels DB, Huybrechts K, Zint K, Schneeweiss S. Safety and effectiveness of dabigatran and warfarin in routine care of patients with atrial fibrillation. *Thromb Haemost.* 2016;114(6):1277–89.
76. Tziomalos K, Giampatzis V, Bouziana SD, Spanou M, Kostaki S, Papadopoulou M, et al. Acenocoumarol vs. low-dose dabigatran in real-world patients discharged after ischemic stroke. *Blood Coagul Fibrinolysis.* 2016;27(2):185–9.
77. Villines TC, Schnee J, Fraeman K, Siu K, Reynolds MW, Collins J, et al. A comparison of the safety and effectiveness of dabigatran and warfarin in non-valvular atrial fibrillation patients in a large healthcare system. *Thromb Haemost.* 2016;114(6):1290–8.
78. Yao X, Abraham NS, Sangaralingham LR, Bellolio MF, McBane RD, Shah ND, et al. Effectiveness and safety of dabigatran, rivaroxaban, and apixaban versus warfarin in nonvalvular atrial fibrillation. *J Am Heart Assoc.* 2016;5(6).
79. Yap LB, Eng DT, Sivalingam L, Rusani BI, Umadevan D, Muhammad Z, et al. A Comparison of Dabigatran With Warfarin for Stroke Prevention in Atrial Fibrillation in an Asian Population. *Clin Appl Thromb Hemost.* 2016;22(8):792–7.
80. Yavuz B, Ayturk M, Ozkan S, Ozturk M, Topaloglu C, Aksoy H, et al. A real world data of dabigatran etexilate: multicenter registry of oral anticoagulants in nonvalvular atrial fibrillation. *J Thromb Thrombolysis.* 2016;42(3):399–404.
81. Yoshimura S, Todo K, Yagita Y, Furui E, Terasaki T, Arihiro S, et al. Two-Year Outcome of Anticoagulant Therapy for Acute Ischemic Stroke with Nonvalvular Atrial Fibrillation – SAMU-RAI-NVAF Study. *Cerebrovasc Dis.* 2016;42(Suppl 1):20.
82. Abraham NS, Noseworthy PA, Yao X, Sangaralingham LR, Shah ND. Gastrointestinal Safety of Direct Oral Anticoagulants: A Large Population-Based Study. *Gastroenterology.* 2017;152(5):1014–22.e1.
83. Adeboyeje G, Sylwestrzak G, Barron JJ, White J, Rosenberg A, Abarca J, et al. Major bleeding risk during anticoagulation with warfarin, dabigatran, apixaban, or rivaroxaban in patients with nonvalvular atrial fibrillation. *J Manag Care Spec Pharm.* 2017;23(9):968–78.
84. Amin A, Keshishian A, Trocio J, Dina O, Le H, Rosenblatt L, et al. Risk of stroke/systemic embolism, major bleeding and associated costs in non-valvular atrial fibrillation patients who initiated apixaban, dabigatran or rivaroxaban compared with warfarin in the United States Medicare population. *Curr Med Res Opin.* 2017;33(9):1595–604.
85. Bengtson LGS, Lutsey PL, Chen LY, MacLehose RF, Alonso A. Comparative effectiveness of dabigatran and rivaroxaban versus warfarin for the treatment of non-valvular atrial fibrillation. *J Cardiol.* 2017;69(6):868–76.
86. Cha MJ, Choi EK, Han KD, Lee SR, Lim WH, Oh S, et al. Effectiveness and Safety of Non-Vitamin K Antagonist Oral Anticoagulants in Asian Patients With Atrial Fibrillation. *Stroke.* 2017;48(11):3040–8.
87. Coleman CI, Antz M. Real-world evidence with apixaban for stroke prevention in patients with nonvalvular atrial fibrillation in Germany: a retrospective study (REASSESS). *Intern Emerg Med.* 2017;12(3):419–22.
88. Coleman CI, Peacock WF, Antz M. Comparative Effectiveness and Safety of Apixaban and Vitamin K Antagonist Therapy in Patients with Nonvalvular Atrial Fibrillation Treated in Routine German Practice. *Heart Lung Circ.* 2018;27(3):390–3.
89. Coleman CI, Peacock WF, Bunz TJ, Alberts MJ. Effectiveness and Safety of Apixaban, Dabigatran, and Rivaroxaban Versus Warfarin in Patients with Nonvalvular Atrial Fibrillation and Previous Stroke or Transient Ischemic Attack. *Stroke.* 2017;48(8):2142–9.
90. Deitelzweig S, Luo X, Gupta K, Trocio J, Mardekian J, Curtice T, et al. Comparison of effectiveness and safety of treatment with apixaban vs. other oral anticoagulants among elderly nonvalvular atrial fibrillation patients. *Curr Med Res Opin.* 2017;33(10):1745–54.
91. Denas G, Gennaro N, Ferroni E, Fedeli U, Saugo M, Zoppellaro G, et al. Effectiveness and safety of oral anticoagulation with non-vitamin K antagonists compared to well-managed vitamin K antagonists in naïve patients with non-valvular atrial fibrillation: Propensity score matched cohort study. *Int J Cardiol.* 2017;249:198–203.
92. Halvorsen S, Ghanima W, Fride Tvete I, Hoxmark C, Falck P, Solli O, et al. A nationwide registry study to compare bleeding rates in patients with atrial fibrillation being prescribed oral anticoagulants. *Eur Heart J Cardiovasc Pharmacother.* 2017;3(1):28–36.
93. Hohnloser SH, Basic E, Nabauer M. Comparative risk of major bleeding with new oral anticoagulants (NOACs) and phenprocoumon in patients with atrial fibrillation: a post-marketing surveillance study. *Clin Res Cardiol.* 2017;106(8):618–28.
94. Kohsaka S, Murata T, Izumi N, Katada J, Wang F, Terayama Y. Bleeding risk of apixaban, dabigatran, and low-dose rivaroxaban compared with warfarin in Japanese patients with non-valvular atrial fibrillation: a propensity matched analysis of administrative claims data. *Curr Med Res Opin.* 2017;33(11):1955–63.
95. Lamberts M, Staerk L, Olesen JB, Fosbøl EL, Hansen ML, Harboe L, et al. Major bleeding complications and persistence with oral anticoagulation in non-valvular atrial fibrillation: Contemporary findings in real-life Danish patients. *J Am Heart Assoc.* 2017;6(2).
96. Leschke M, Hess S, Weber E, Haas S. Stroke prevention with rivaroxaban in routine clinical practice – current study data concerning stroke prophylaxis in patients with non-valvular atrial fibrillation in Germany. *Klinikerzt.* 2017;46(3):104–10.
97. Li WH, Huang D, Chiang CE, Lau CP, Tse HF, Chan EW, et al. Efficacy and safety of dabigatran, rivaroxaban, and warfarin for stroke prevention in Chinese patients with atrial fibrillation: the Hong Kong Atrial Fibrillation Project. *Clin Cardiol.* 2017;40(4):222–9.

98. Li X, Deitelzweig S, Keshishian A, Hamilton M, Horblyuk R, Gupta K, et al. Effectiveness and safety of apixaban versus warfarin in non-valvular atrial fibrillation patients in "real-world" clinical practice: A propensity-matched analysis of 76,940 patients. *Thromb Haemost.* 2017;117(6):1072–82.
99. Lin J, Trocio J, Gupta K, Mardekian J, Lingohr-Smith M, Menges B, et al. Major bleeding risk and healthcare economic outcomes of non-valvular atrial fibrillation patients newly-initiated with oral anticoagulant therapy in the real-world setting. *J Med Econ.* 2017;20(9):952–61.
100. Naganuma M, Shiga T, Nagao T, Suzuki A, Murasaki K, Hagiwara N. Effectiveness and safety of dabigatran versus warfarin in "real-world" Japanese patients with atrial fibrillation: A single-center observational study. *J Arrhythm.* 2017;33(2):107–10.
101. Nielsen PB, Skjoth F, Sogaard M, Kjaeldgaard JN, Lip GY, Larsen TB. Effectiveness and safety of reduced dose non-vitamin K antagonist oral anticoagulants and warfarin in patients with atrial fibrillation: propensity weighted nationwide cohort study. *BMJ.* 2017;356:j510.
102. Norby FL, Bengtson LGS, Lutsey PL, Chen LY, MacLehose RF, Chamberlain AM, et al. Comparative effectiveness of rivaroxaban versus warfarin or dabigatran for the treatment of patients with non-valvular atrial fibrillation. *BMC Cardiovasc Disord.* 2017;17(1).
103. Noseworthy PA, Yao X, Gersh BJ, Hargraves I, Shah ND, Montori VM. Long-term stroke and bleeding risk in patients with atrial fibrillation treated with oral anticoagulants in contemporary practice: Providing evidence for shared decision-making. *Int J Cardiol.* 2017;245:174–7.
104. Peacock WF, Tamayo S, Sicignano N, Hopf KP, Yuan Z, Patel M. Comparison of the Incidence of Major Bleeding With Rivaroxaban Use Among Nonvalvular Atrial Fibrillation Patients With Versus Without Diabetes Mellitus. *An J Cardiol.* 2017;119(5):753–9.
105. Russo-Alvarez G, Martinez KA, Valente M, Bena J, Hu B, Luxenburg J, et al. Thromboembolic and Major Bleeding Events With Rivaroxaban Versus Warfarin Use in a Real-World Setting. *Ann Pharmacother.* 2017;1060028017727290.
106. Staerk L, Fosbol EL, Lip GYH, Lamberts M, Bonde AN, Torp-Pedersen C, et al. Ischaemic and haemorrhagic stroke associated with non-vitamin K antagonist oral anti-coagulants and warfarin use in patients with atrial fibrillation: a nationwide cohort study. *Eur Heart J.* 2017;38(12):907–15.
107. Weir MR, Berger JS, Ashton V, Laliberté F, Brown K, Lefebvre P, et al. Impact of renal function on ischemic stroke and major bleeding rates in nonvalvular atrial fibrillation patients treated with warfarin or rivaroxaban: a retrospective cohort study using real-world evidence. *Curr Med Res Opin.* 2017;33(10):1891–900.
108. Yamashita Y, Uozumi R, Hamatani Y, Esato M, Chun YH, Tsuji H, et al. Current status and outcomes of direct oral anticoagulant use in real-world atrial fibrillation patients – fushimi AF registry. *Circ J.* 2017;81(9):1278–85.
109. Yiginer O, Tezcan M, Erdal E, Degirmencioglu G, Acar G, Ergelen M, et al. A real-world, retrospective, observational study of dabigatran and rivaroxaban in turkey: Elderly patients receive inappropriately low dose of rivaroxaban. *Int J Clin Exp Med.* 2017;10(7):10634–42.
110. Burn J, Pirmohamed M. Direct oral anticoagulants versus warfarin: is new always better than the old? *Open Heart.* 2018;5(1):e000712.
111. Douxfils J, Buckinx F, Mullier F, Minet V, Rabenda V, Reginster JY, et al. Dabigatran etexilate and risk of myocardial infarction, other cardiovascular events, major bleeding, and all-cause mortality: a systematic review and meta-analysis of randomized controlled trials. *J Am Heart Assoc.* 2014;3(3):e000515.
112. Loffredo L, Perri L, Del Ben M, Angelico F, Violi F. New oral anticoagulants for the treatment of acute venous thromboembolism: are they safer than vitamin K antagonists? A meta-analysis of the interventional trials. *Intern Emerg Med.* 2015;10(4):499–506.
113. Kirchhof P, Benussi S, Kotecha D, Ahlsson A, Atar D, Casadei B, et al. [2016 ESC Guidelines for the management of atrial fibrillation developed in collaboration with EACTS]. *Kardiolog Pol.* 2016;74(12):1359–469.
